# Supplementary material for: Dual C–H activation: Rh(iii)-catalyzed cascade π-extended annulation of 2-arylindole with benzoquinone
Source: Royal Society of Chemistry journal article supplement (doi:10.1039/d1ra01779a), 2021-01-01

# Dual C–H activation: Rh(III)-catalyzed cascade $\pi$ -extended annulation of 2-arylindole with benzoquinone

Qijing Zhang, Qianrong Li and Chengming Wang\*

*Department of Chemistry, College of Chemistry and Materials Science  
Jinan University  
Guangzhou, 511443, China  
Email: [cmwang2019@jnu.edu.cn](mailto:cmwang2019@jnu.edu.cn)*

## Table of Contents:

---

|                                           |       |
|-------------------------------------------|-------|
| General Methods and Materials             | 2     |
| Conditions Screening                      | 3-5   |
| General Procedure for Dual C–H Activation | 6     |
| Characterization of Products              | 7-13  |
| References                                | 14    |
| NMR Spectra Images of Products            | 15-34 |

---

## General Methods and Materials:

Unless specified, all reactions were carried out under air using commercial available solvents as received. Dichloro( $\eta^5$ -pentamethylcyclopentadienyl)rhodium(III) dimer was synthesized according to a previous literature.<sup>1</sup> 2-phenyl indole was purchased from Alfa Aesar and used directly. All 2-aryl indole starting materials are synthesized according to literatures.<sup>2</sup> All other reagents were purchased and used without further purification unless specified otherwise. Solvents for chromatography were technical grade and distilled prior to use. Column chromatography was performed using silica gel Merck 60 (particle size 0.063–0.2 mm). Analytical thin-layer chromatography (TLC) was performed on Merck silica gel aluminium plates with GF-254 indicator. Visualization of the developed chromatogram was performed by UV absorbance (254 nm). <sup>1</sup>H NMR and <sup>13</sup>C NMR data were recorded on Varian VNMR 600, Varian VNMR 400 or Mercury 300 spectrometer. Chemical shifts ( $\delta$ ) in ppm are reported as quoted relative to the residual signals of dimethyl sulfoxide (<sup>1</sup>H 2.49 ppm or <sup>13</sup>C 39.60 ppm). Multiplicities are described as: s (singlet), d (doublet), t (triplet), q (quartet), m (multiplet); and coupling constants (*J*) are reported in Hertz (Hz). <sup>13</sup>C NMR spectra were recorded with total proton decoupling. High-resolution mass spectra (HRMS) was collected in ESI mode by using a MicrOTOF mass spectrometer.

Conditions Screening: <sup>a</sup>

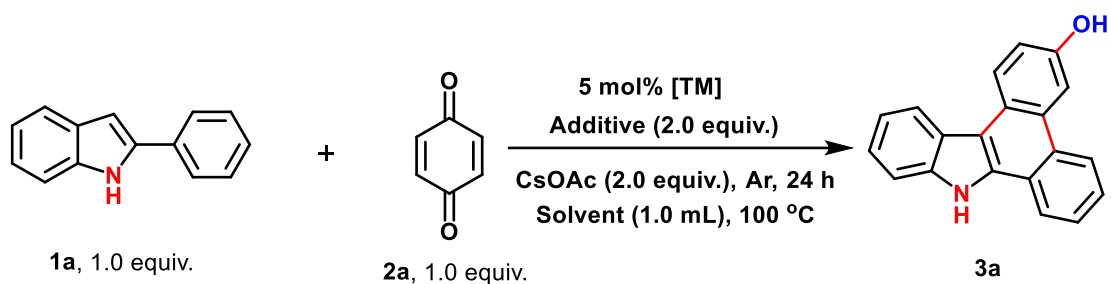

| Entry          | Solvent          | Catalyst                                             | Additive                               | Results |
|----------------|------------------|------------------------------------------------------|----------------------------------------|---------|
| 1              | DMF              | [RhCp*Cl <sub>2</sub> ] <sub>2</sub>                 | Cu(OAc) <sub>2</sub> ·H <sub>2</sub> O | 55%     |
| 2              | DMF              | [RhCp*Cl <sub>2</sub> ] <sub>2</sub>                 | –                                      | <5%     |
| 3              | DMF              | –                                                    | Cu(OAc) <sub>2</sub> ·H <sub>2</sub> O | –       |
| 4 <sup>b</sup> | DMF              | [RhCp*Cl <sub>2</sub> ] <sub>2</sub>                 | Cu(OAc) <sub>2</sub> ·H <sub>2</sub> O | 40%     |
| 5              | Dioxane          | [RhCp*Cl <sub>2</sub> ] <sub>2</sub>                 | Cu(OAc) <sub>2</sub> ·H <sub>2</sub> O | 48%     |
| 6              | <i>t</i> -AmOH   | [RhCp*Cl <sub>2</sub> ] <sub>2</sub>                 | Cu(OAc) <sub>2</sub> ·H <sub>2</sub> O | –       |
| 7              | MeCN             | [RhCp*Cl <sub>2</sub> ] <sub>2</sub>                 | Cu(OAc) <sub>2</sub> ·H <sub>2</sub> O | 52%     |
| 8              | DCE              | [RhCp*Cl <sub>2</sub> ] <sub>2</sub>                 | Cu(OAc) <sub>2</sub> ·H <sub>2</sub> O | 43%     |
| 9              | <i>o</i> -xylene | [RhCp*Cl <sub>2</sub> ] <sub>2</sub>                 | Cu(OAc) <sub>2</sub> ·H <sub>2</sub> O | 54%     |
| 10             | DMAc             | [RhCp*Cl <sub>2</sub> ] <sub>2</sub>                 | Cu(OAc) <sub>2</sub> ·H <sub>2</sub> O | <5%     |
| 11             | DMSO             | [RhCp*Cl <sub>2</sub> ] <sub>2</sub>                 | Cu(OAc) <sub>2</sub> ·H <sub>2</sub> O | trace   |
| 12             | DME              | [RhCp*Cl <sub>2</sub> ] <sub>2</sub>                 | Cu(OAc) <sub>2</sub> ·H <sub>2</sub> O | 40%     |
| 13             | NMP              | [RhCp*Cl <sub>2</sub> ] <sub>2</sub>                 | Cu(OAc) <sub>2</sub> ·H <sub>2</sub> O | 7%      |
| 14             | DMF              | [RuCl <sub>2</sub> ( <i>p</i> -cymene)] <sub>2</sub> | Cu(OAc) <sub>2</sub> ·H <sub>2</sub> O | –       |
| 15             | DMF              | Pd(OAc) <sub>2</sub>                                 | Cu(OAc) <sub>2</sub> ·H <sub>2</sub> O | –       |
| 16             | DMF              | PdCl <sub>2</sub>                                    | Cu(OAc) <sub>2</sub> ·H <sub>2</sub> O | –       |
| 17             | DMF              | PdCl <sub>2</sub> (MeCN) <sub>2</sub>                | Cu(OAc) <sub>2</sub> ·H <sub>2</sub> O | <5%     |
| 18             | DMF              | [RhCp*(OAc)] <sub>2</sub>                            | Cu(OAc) <sub>2</sub> ·H <sub>2</sub> O | 47%     |
| 19             | DMF              | RhCl(PPh <sub>3</sub> ) <sub>3</sub>                 | Cu(OAc) <sub>2</sub> ·H <sub>2</sub> O | <5%     |
| 20             | DMF              | [Rh(coe)Cl] <sub>2</sub>                             | Cu(OAc) <sub>2</sub> ·H <sub>2</sub> O | <5%     |
| 21             | DMF              | Cp*CoI <sub>2</sub> (CO)                             | Cu(OAc) <sub>2</sub> ·H <sub>2</sub> O | –       |
| 22             | DMF              | [RhCp*Cl <sub>2</sub> ] <sub>2</sub>                 | AgOAc                                  | –       |

|                          |                             |                                      |                                                  |            |
|--------------------------|-----------------------------|--------------------------------------|--------------------------------------------------|------------|
| 23                       | DMF                         | [RhCp*Cl <sub>2</sub> ] <sub>2</sub> | Ag <sub>2</sub> O                                | –          |
| 24                       | DMF                         | [RhCp*Cl <sub>2</sub> ] <sub>2</sub> | Cu(acac) <sub>2</sub>                            | trace      |
| 25                       | DMF                         | [RhCp*Cl <sub>2</sub> ] <sub>2</sub> | CuCl <sub>2</sub>                                | 17%        |
| 26                       | DMF                         | [RhCp*Cl <sub>2</sub> ] <sub>2</sub> | Copper 2-ethylhexoate                            | 28%        |
| 27                       | DMF                         | [RhCp*Cl <sub>2</sub> ] <sub>2</sub> | CuOAc                                            | 12%        |
| 28                       | DMF                         | [RhCp*Cl <sub>2</sub> ] <sub>2</sub> | Fe(OAc) <sub>2</sub>                             | <5%        |
| 29 <sup>c</sup>          | DMF                         | [RhCp*Cl <sub>2</sub> ] <sub>2</sub> | Cu(OAc) <sub>2</sub> ·H <sub>2</sub> O           | 50%        |
| 30 <sup>d</sup>          | DMF                         | [RhCp*Cl <sub>2</sub> ] <sub>2</sub> | Cu(OAc) <sub>2</sub> ·H <sub>2</sub> O           | 59%        |
| 31 <sup>e</sup>          | DMF                         | [RhCp*Cl <sub>2</sub> ] <sub>2</sub> | Cu(OAc) <sub>2</sub> ·H <sub>2</sub> O           | 54%        |
| 32                       | DMF                         | [RhCp*Cl <sub>2</sub> ] <sub>2</sub> | O <sub>2</sub>                                   | –          |
| 33 <sup>f, g</sup>       | DMF                         | [RhCp*Cl <sub>2</sub> ] <sub>2</sub> | Cu(OAc) <sub>2</sub> ·H <sub>2</sub> O (10 mol%) | 33%        |
| 34 <sup>e, h</sup>       | DMF                         | [RhCp*Cl <sub>2</sub> ] <sub>2</sub> | Cu(OAc) <sub>2</sub> ·H <sub>2</sub> O           | 59%        |
| 35 <sup>e, g, h</sup>    | DMF                         | [RhCp*Cl <sub>2</sub> ] <sub>2</sub> | Cu(OAc) <sub>2</sub> ·H <sub>2</sub> O           | 0%         |
| 36 <sup>e, i</sup>       | DMF                         | [RhCp*Cl <sub>2</sub> ] <sub>2</sub> | Cu(OAc) <sub>2</sub> ·H <sub>2</sub> O           | 45%        |
| 37 <sup>e, h, j</sup>    | DMF                         | [RhCp*Cl <sub>2</sub> ] <sub>2</sub> | Cu(OAc) <sub>2</sub> ·H <sub>2</sub> O           | 47%        |
| 38 <sup>e, h, k</sup>    | DMF                         | [RhCp*Cl <sub>2</sub> ] <sub>2</sub> | Cu(OAc) <sub>2</sub> ·H <sub>2</sub> O           | 59%        |
| 39 <sup>e, h</sup>       | DMF                         | [RhCp*Cl <sub>2</sub> ] <sub>2</sub> | PhI(OAc) <sub>2</sub>                            | –          |
| 40 <sup>e, h, l</sup>    | DMF                         | [RhCp*Cl <sub>2</sub> ] <sub>2</sub> | Cu(OAc) <sub>2</sub> ·H <sub>2</sub> O           | 65%        |
| 41 <sup>e, h, l</sup>    | DMF/DCE (4:1)               | [RhCp*Cl <sub>2</sub> ] <sub>2</sub> | Cu(OAc) <sub>2</sub> ·H <sub>2</sub> O           | 69%        |
| 42 <sup>e, h, l</sup>    | DMF                         | [RhCp*Cl <sub>2</sub> ] <sub>2</sub> | Cu(OAc) <sub>2</sub> ·H <sub>2</sub> O           | 60% (48 h) |
| 43 <sup>d, e, h, l</sup> | DMF                         | [RhCp*Cl <sub>2</sub> ] <sub>2</sub> | Cu(OAc) <sub>2</sub> ·H <sub>2</sub> O           | 62%        |
| 44 <sup>e, h, l, m</sup> | DMF                         | [RhCp*Cl <sub>2</sub> ] <sub>2</sub> | Cu(OAc) <sub>2</sub> ·H <sub>2</sub> O           | 62%        |
| 45 <sup>e, h, l</sup>    | DMF/DCE (1:1)               | [RhCp*Cl <sub>2</sub> ] <sub>2</sub> | Cu(OAc) <sub>2</sub> ·H <sub>2</sub> O           | 67%        |
| 46 <sup>h, l, n</sup>    | DMF                         | [RhCp*Cl <sub>2</sub> ] <sub>2</sub> | Cu(OAc) <sub>2</sub> ·H <sub>2</sub> O           | 47%        |
| 47 <sup>e, h, l, o</sup> | DMF/DCE (4:1)               | [RhCp*Cl <sub>2</sub> ] <sub>2</sub> | Cu(OAc) <sub>2</sub> ·H <sub>2</sub> O           | 52%        |
| 48 <sup>e, h, l</sup>    | DMF/DCE (2:1)               | [RhCp*Cl <sub>2</sub> ] <sub>2</sub> | Cu(OAc) <sub>2</sub> ·H <sub>2</sub> O           | 74%        |
| 49 <sup>e, h, l, p</sup> | DMF                         | [RhCp*Cl <sub>2</sub> ] <sub>2</sub> | Cu(OAc) <sub>2</sub> ·H <sub>2</sub> O           | 42%        |
| 50 <sup>e, l, q</sup>    | DMF                         | [RhCp*Cl <sub>2</sub> ] <sub>2</sub> | Cu(OAc) <sub>2</sub> ·H <sub>2</sub> O           | 67%        |
| 51 <sup>e, h, l</sup>    | DMF/ <i>o</i> -xylene (2:1) | [RhCp*Cl <sub>2</sub> ] <sub>2</sub> | Cu(OAc) <sub>2</sub> ·H <sub>2</sub> O           | 62%        |

|                                |                      |                                          |                                           |                   |
|--------------------------------|----------------------|------------------------------------------|-------------------------------------------|-------------------|
| 52 <sup>e, q, r</sup>          | DMF                  | [RhCp*Cl <sub>2</sub> ] <sub>2</sub>     | Cu(OAc) <sub>2</sub> ·H <sub>2</sub> O    | 70%               |
| 53 <sup>e, l, q</sup>          | DMF                  | [RhCp*Cl <sub>2</sub> ] <sub>2</sub>     | Cu(OAc) <sub>2</sub> ·H <sub>2</sub> O    | 57%               |
| 54 <sup>e, l, q</sup>          | DMF/DCE (2:1)        | [RhCp*Cl <sub>2</sub> ] <sub>2</sub>     | Cu(OAc) <sub>2</sub> ·H <sub>2</sub> O    | 74%               |
| <b>55<sup>e, q, r, s</sup></b> | <b>DMF/DCE (2:1)</b> | <b>[RhCp*Cl<sub>2</sub>]<sub>2</sub></b> | <b>Cu(OAc)<sub>2</sub>·H<sub>2</sub>O</b> | <b>84% (36 h)</b> |

<sup>a</sup> 0.2 mmol scale, isolated yield;

<sup>b</sup> without CsOAc;

<sup>c</sup> 0.5 equiv. CsOAc;

<sup>d</sup> 0.3 equiv. AgOAc;

<sup>e</sup> NaOAc instead of CsOAc;

<sup>f</sup> Na<sub>2</sub>CO<sub>3</sub> instead of CsOAc;

<sup>g</sup> under air;

<sup>h</sup> 2.0 equiv. BQ;

<sup>i</sup> 3.0 equiv. Cu(OAc)<sub>2</sub>·H<sub>2</sub>O;

<sup>j</sup> 80 °C;

<sup>k</sup> 120 °C;

<sup>l</sup> 1.0 equiv. Cu(OAc)<sub>2</sub>·H<sub>2</sub>O;

<sup>m</sup> 0.2 equiv. AgSbF<sub>6</sub>;

<sup>n</sup> 1.0 equiv. NaOAc;

<sup>o</sup> 90 °C;

<sup>p</sup> 0.5 equiv. NaOAc;

<sup>q</sup> 1.5 equiv. **1a** and 1 equiv. **2a**;

<sup>r</sup> 2.1 equiv. Cu(OAc)<sub>2</sub>·H<sub>2</sub>O;

<sup>s</sup> 0.3 mmol scale.

## General Procedure for Dual C–H Activation

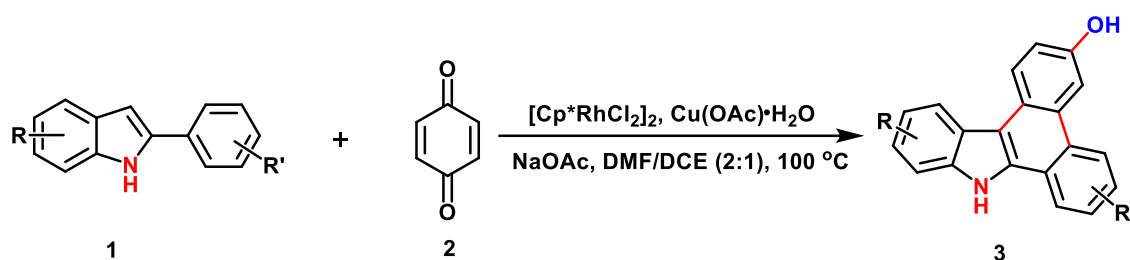

### Condition A:

$[\text{Cp}^*\text{RhCl}_2]_2$  (0.015 mmol, 9.3 mg, 5 mol %),  $\text{NaOAc}$  (0.6 mmol, 49.2 mg, 2.0 equiv.),  $\text{Cu}(\text{OAc})_2 \cdot \text{H}_2\text{O}$  (0.63 mmol, 125.8 mg, 2.1 equiv.) and 2-aryl indole substrate **1** (0.45 mmol, 1.5 equiv.) were weighed into a Schlenk tube. The reaction vessel was capped and subjected to three vacuum-purge/argon-flush cycles. A solution of benzoquinone (0.3 mmol, 1.0 equiv.) in  $\text{DMF}/\text{DCE}$  (2:1, 1.5 mL) was then added through the side-arm by syringe. The reaction was stirred under argon at  $100\text{ }^\circ\text{C}$ . Upon complete of the reaction, it was cooled to room temperature. 30 mL water was added and then extracted with  $\text{EtOAc}$  (3 times), dried over  $\text{MgSO}_4$  and the obtained solvent was removed by rotary evaporation and the residue was purified by silica gel flash chromatography using *n*-Hexane/ $\text{EtOAc}$  (10:1 to 6:1) to afford product **3**.

### Condition B:

$[\text{Cp}^*\text{RhCl}_2]_2$  (0.015 mmol, 9.3 mg, 5 mol%),  $\text{NaOAc}$  (0.6 mmol, 49.2 mg, 2.0 equiv.),  $\text{Cu}(\text{OAc})_2 \cdot \text{H}_2\text{O}$  (0.63 mmol, 125.8 mg, 2.1 equiv.) and 2-aryl indole substrate **1** (0.30 mmol, 1.0 equiv.) were weighed into a Schlenk tube. The reaction vessel was capped and subjected to three vacuum-purge/argon-flush cycles. A solution of benzoquinone (0.6 mmol, 2.0 equiv.) in  $\text{DMF}/\text{DCE}$  (2:1, 1.5 mL) was then added through the side-arm by syringe. The reaction was stirred under argon at  $60\text{ }^\circ\text{C}$ . Upon complete of the reaction, it was cooled to room temperature. 30 mL water was added and then extracted with  $\text{EtOAc}$  (3 times), dried over  $\text{MgSO}_4$  and the obtained solvent was removed by rotary evaporation and the residue was purified by silica gel flash chromatography using *n*-Hexane/ $\text{EtOAc}$  (10:1 to 6:1) to afford product **3**.

## Characterization of Products:

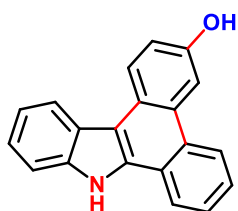

9H-dibenzo[*a,c*]carbazol-3-ol (**3a**).<sup>3</sup> **Condition A**, 36 h, yield: 84%, gray solid. <sup>1</sup>H NMR (*d*<sub>6</sub>-DMSO, 600 MHz): δ 12.20 (s, 1H), 9.65 (s, 1H), 8.70 (d, *J* = 8.2 Hz, 1H), 8.65 (d, *J* = 8.6 Hz, 1H), 8.54 (d, *J* = 7.9 Hz, 1H), 8.50 (d, *J* = 7.9 Hz, 1H), 8.16 (s, 1H), 7.74 (t, *J* = 7.2 Hz, 1H), 7.68 – 7.66 (m, 2H), 7.39 (t, *J* = 7.3 Hz, 1H), 7.33 (d, *J* = 7.1 Hz, 1H), 7.27 (d, *J* = 7.4 Hz, 1H); <sup>13</sup>C NMR (*d*<sub>6</sub>-DMSO, 150 MHz): δ 154.0, 138.6, 132.5, 128.8, 128.0, 127.0, 126.2, 124.8, 123.9, 123.5, 123.5, 123.1, 122.8, 122.3, 121.4, 119.8, 117.6, 111.8, 111.7, 108.2.

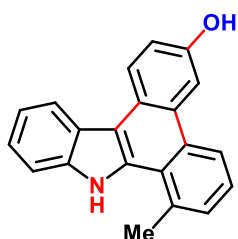

8-methyl-9H-dibenzo[*a,c*]carbazol-3-ol (**3b**).<sup>3</sup> **Condition B**, 48 h, yield: 57%, gray solid. <sup>1</sup>H NMR (*d*<sub>6</sub>-DMSO, 600 MHz): δ 11.10 (s, 1H), 9.62 (s, 1H), 8.73 (d, *J* = 8.8 Hz, 1H), 8.61 (d, *J* = 8.1 Hz, 1H), 8.56 (d, *J* = 8.0 Hz, 1H), 8.50 (d, *J* = 7.9 Hz, 1H), 8.16 (s, 1H), 7.92 (t, *J* = 8.1 Hz, 1H), 7.56 – 7.51 (m, 2H), 7.40 (d, *J* = 7.4 Hz, 1H), 7.34 (d, *J* = 8.6 Hz, 1H), 7.43 (t, *J* = 7.6 Hz, 1H), 3.17 (s, 3H); <sup>13</sup>C NMR (*d*<sub>6</sub>-DMSO, 150 MHz): δ 154.1, 138.8, 133.0, 132.2, 129.9, 129.7, 128.4, 125.5, 124.6, 123.3, 122.9, 122.7, 122.4, 122.0, 121.1, 120.0, 117.7, 113.0, 112.9, 108.3, 24.2.

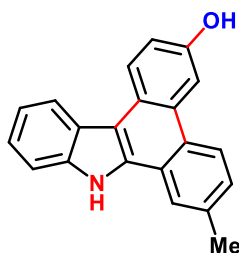

7-methyl-9H-dibenzo[*a,c*]carbazol-3-ol (**3c**).<sup>3</sup> **Condition B**, 45.5 h, yield: 53%, gray solid. <sup>1</sup>H NMR (*d*<sub>6</sub>-DMSO, 600 MHz): δ 12.10 (s, 1H), 9.57 (s, 1H), 8.62 (d, *J* = 8.7 Hz, 1H), 8.57 (d, *J* = 8.5 Hz, 1H), 8.47 (d, *J* = 8.0 Hz, 1H), 8.34 (s, 1H), 8.10 (d, *J* = 2.3 Hz, 1H), 7.66 (d, *J* = 8.0 Hz,

1H), 7.50 (d,  $J = 8.4$  Hz, 1H), 7.37 (t,  $J = 7.7$  Hz, 1H), 7.29 – 7.25 (m, 2H), 2.59 (s, 3H);  $^{13}\text{C}$  NMR ( $d_6$ -DMSO, 150 MHz):  $\delta$  153.9, 138.5, 136.3, 132.4, 128.1, 127.7, 126.7, 124.7, 123.8, 123.5, 123.4, 123.1, 122.4, 121.9, 121.2, 119.7, 117.1, 111.7, 108.0, 21.4.

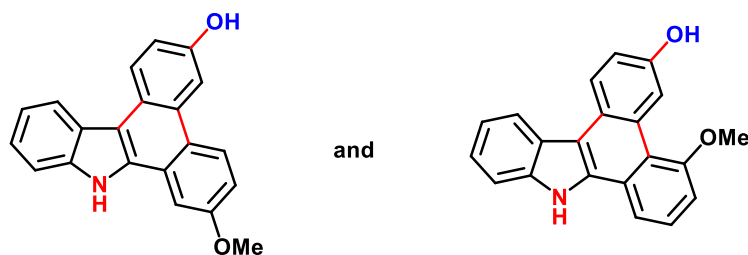

7-methoxy-9H-dibenzo[*a,c*]carbazol-3-ol (**3d**) and 5-methoxy-9H-dibenzo[*a,c*]carbazol-3-ol (**3d'**). **Condition B**, 45.5 h, yield: 68%, isolated as an inseparable mixture, ratio = 5:3, gray solid.  $^1\text{H}$  NMR ( $d_6$ -DMSO, 400 MHz):  $\delta$  12.10 (s, 1H), 12.10 (s, 0.7H), 9.55 (s, 1H), 9.41 (s, 0.7H), 9.22 (d,  $J = 2.5$  Hz, 0.7H), 8.65 (d,  $J = 8.8$  Hz, 0.7H), 8.61 (d,  $J = 7.8$  Hz, 1.7H), 8.58 (s, 0.6H), 8.49 (d,  $J = 8.0$  Hz, 1.7H), 8.16 (d,  $J = 8.0$  Hz, 0.7H), 8.06 – 8.04 (m, 2H), 7.70 – 7.65 (m, 2.3H), 7.41 – 7.37 (m, 1.7H), 7.29 – 7.24 (m, 4.8H), 6.57 (s, 0.7H), 4.12 (s, 1.8H), 4.01 (s, 3H);  $^{13}\text{C}$  NMR ( $d_6$ -DMSO, 150 MHz):  $\delta$  159.0, 158.4, 154.0, 153.3, 149.8, 138.8, 138.5, 132.7, 132.4, 128.2, 127.9, 127.4, 125.6, 125.2, 124.7, 124.3, 123.9, 123.6, 123.5, 123.2, 123.1, 122.8, 121.7, 121.5, 121.4, 119.7, 118.7, 116.5, 116.3, 115.8, 115.7, 114.8, 114.4, 112.3, 112.1, 111.7, 108.7, 107.7, 103.6, 56.0, 55.6. HRMS (ESI) calcd. for  $\text{C}_{21}\text{H}_{14}\text{NO}_2$  [ $\text{M}-\text{H}$ ] $^-$ : 312.1030, found: 312.1026.

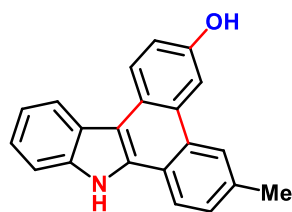

6-methyl-9H-dibenzo[*a,c*]carbazol-3-ol (**3e**).<sup>3</sup> **Condition B**, 48 h, yield: 47%, gray solid.  $^1\text{H}$  NMR ( $d_6$ -DMSO, 600 MHz):  $\delta$  12.10 (s, 1H), 9.56 (s, 1H), 8.62 (d,  $J = 8.8$  Hz, 1H), 8.57 (d,  $J = 8.5$  Hz, 1H), 8.50 (s, 1H), 8.47 (d,  $J = 8.0$  Hz, 1H), 8.43 (d,  $J = 8.2$  Hz, 1H), 8.16 (d,  $J = 2.2$  Hz, 1H), 7.66 (d,  $J = 8.0$  Hz, 1H), 7.58 (d,  $J = 8.0$  Hz, 1H), 7.37 (t,  $J = 7.4$  Hz, 1H), 7.31 (dd,  $J = 8.6$ , 2.2 Hz, 1H), 7.26 (t,  $J = 7.6$  Hz, 1H), 2.61 (s, 3H);  $^{13}\text{C}$  NMR ( $d_6$ -DMSO, 150 MHz):  $\delta$  153.8, 138.4, 135.4, 132.7, 128.9, 128.4, 127.8, 124.7, 123.6, 123.6, 123.2, 123.0, 122.3, 121.1, 120.9, 119.7, 117.5, 111.7, 111.1, 108.2, 21.8.



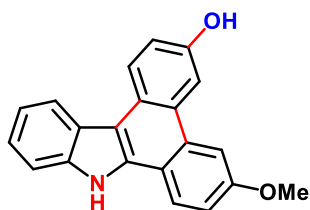

6-methoxy-9H-dibenzo[*a,c*]carbazol-3-ol (**3f**).<sup>3</sup> **Condition B**, 45.5 h, yield: 59%, gray solid. <sup>1</sup>H NMR (*d*<sub>6</sub>-DMSO, 600 MHz): δ 12.10 (s, 1H), 9.55 (s, 1H), 8.61 (d, *J* = 8.7 Hz, 1H), 8.46 (d, *J* = 8.8 Hz, 1H), 8.44 (d, *J* = 8.0 Hz, 1H), 8.13 (d, *J* = 2.2 Hz, 1H), 8.08 (d, *J* = 2.1 Hz, 1H), 7.64 (d, *J* = 8.0 Hz, 1H), 7.41 (dd, *J* = 8.8, 2.3 Hz, 1H), 7.34 (t, *J* = 7.5 Hz, 1H), 7.31 (dd, *J* = 8.6, 2.2 Hz, 1H), 7.25 (t, *J* = 7.7 Hz, 1H), 4.02 (s, 3H); <sup>13</sup>C NMR (*d*<sub>6</sub>-DMSO, 150 MHz): δ 157.9, 153.7, 138.3, 132.9, 130.4, 127.5, 124.7, 123.9, 123.6, 123.2, 122.9, 120.9, 119.6, 117.7, 117.3, 116.6, 111.5, 110.1, 108.5, 105.8, 55.5.

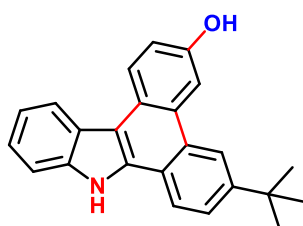

6-(tert-butyl)-9H-dibenzo[*a,c*]carbazol-3-ol (**3g**). **Condition B**, 48 h, yield: 59%, gray solid. <sup>1</sup>H NMR (*d*<sub>6</sub>-DMSO, 600 MHz): δ 12.10 (s, 1H), 9.57 (s, 1H), 8.63 (d, *J* = 8.8 Hz, 2H), 8.48 (t, *J* = 8.5 Hz, 1H), 8.21 (d, *J* = 1.9 Hz, 1H), 7.85 (d, *J* = 8.4 Hz, 1H), 7.67 (d, *J* = 8.0 Hz, 1H), 7.37 (t, *J* = 7.4 Hz, 1H), 7.31 (dd, *J* = 8.6, 2.1 Hz, 1H), 7.27 (t, *J* = 7.5 Hz, 1H), 1.49 (s, 9H); <sup>13</sup>C NMR (*d*<sub>6</sub>-DMSO, 150 MHz): δ 153.8, 148.3, 138.5, 132.6, 128.4, 128.1, 125.1, 124.8, 123.6, 123.2, 123.0, 122.2, 121.2, 120.9, 119.6, 119.2, 117.4, 111.7, 111.2, 108.0, 35.1, 31.4. HRMS (ESI) calcd. for C<sub>24</sub>H<sub>20</sub>NO [M-H]<sup>-</sup>: 338.1550, found: 338.1557.

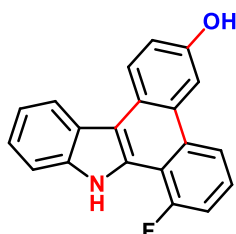

8-fluoro-9H-dibenzo[*a,c*]carbazol-3-ol (**3h**). **Condition A**, 48 h, yield: 68%, white solid. <sup>1</sup>H NMR (*d*<sub>6</sub>-DMSO, 400 MHz): δ 11.73 (d, *J* = 2.9 Hz, 1H), 9.74 (s, 1H), 8.73 (d, *J* = 8.9 Hz, 1H), 8.55 (t, *J* = 8.9 Hz, 2H), 8.16 (d, *J* = 2.4 Hz, 1H), 7.84 (d, *J* = 8.0 Hz, 1H), 7.67 (td, *J* = 8.0, 6.1 Hz, 1H), 7.59 (dd, *J* = 11.8, 8.0 Hz, 1H), 7.43 – 7.37 (s, 2H), 7.30 (td, *J* = 8.1, 1.0 Hz, 1H); <sup>19</sup>F NMR

( $d_6$ -DMSO, 564 MHz):  $\delta$  -116.3 (m, 1F);  $^{13}\text{C}$  NMR ( $d_6$ -DMSO, 150 MHz):  $\delta$  158.3 (d,  $J_{1\text{F}} = 246.0$  Hz), 154.3, 138.9 (d,  $J_{4\text{F}} = 2.2$  Hz), 131.2 (d,  $J_{3\text{F}} = 4.7$  Hz), 127.8, 127.1, 126.2 (d,  $J_{3\text{F}} = 8.8$  Hz), 125.0, 123.7, 123.0, 122.2, 121.2, 120.0, 120.0, 120.0, 118.5, 112.8, 112.5 (d,  $J_{2\text{F}} = 14.2$  Hz), 112.3 (d,  $J_{2\text{F}} = 20.2$  Hz), 108.6. HRMS (ESI) calcd. for  $\text{C}_{20}\text{H}_{11}\text{FNO}$  [ $\text{M}-\text{H}$ ] $^-$ : 300.0830, found: 300.0824.

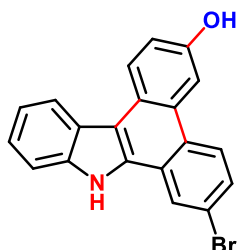

7-bromo-9H-dibenzo[*a,c*]carbazol-3-ol (**3i**).<sup>3</sup> **Condition A**, 48 h, yield: 64%, white solid.  $^1\text{H}$  NMR ( $d_6$ -DMSO, 400 MHz):  $\delta$  12.26 (s, 1H), 9.69 (s, 1H), 8.80 (d,  $J = 2.0$  Hz, 2H), 8.65 (t,  $J = 7.4$  Hz, 2H), 8.50 (d,  $J = 8.0$  Hz, 1H), 8.12 (d,  $J = 2.2$  Hz, 1H), 7.78 (dd,  $J = 8.8, 2.0$  Hz, 1H), 7.67 (d,  $J = 8.0$  Hz, 1H), 7.41 (t,  $J = 7.6$  Hz, 1H), 7.35 (dd,  $J = 8.7, 2.2$  Hz, 1H), 7.28 (t,  $J = 7.7$  Hz, 1H);  $^{13}\text{C}$  NMR ( $d_6$ -DMSO, 100 MHz):  $\delta$  154.2, 138.7, 131.2, 128.6, 127.5, 126.3, 125.0, 124.6, 124.5, 124.0, 123.2, 122.7, 121.5, 120.4, 119.9, 118.1, 112.8, 111.9, 108.2.

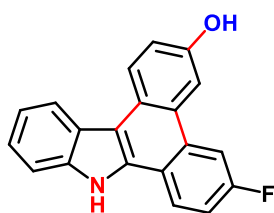

6-fluoro-9H-dibenzo[*a,c*]carbazol-3-ol (**3j**).<sup>3</sup> **Condition A**, 48 h, yield: 56%, white solid.  $^1\text{H}$  NMR ( $d_6$ -DMSO, 600 MHz):  $\delta$  12.21 (s, 1H), 9.65 (s, 1H), 8.65 (d,  $J = 8.8$  Hz, 1H), 8.58 (dd,  $J = 8.9, 5.9$  Hz, 1H), 8.49 (d,  $J = 8.0$  Hz, 1H), 8.45 (dd,  $J = 11.8, 2.3$  Hz, 1H), 8.09 (d,  $J = 2.3$  Hz, 1H), 7.67 (d,  $J = 8.0$  Hz, 1H), 7.65 (td,  $J = 8.5, 2.4$  Hz, 1H), 7.38 (td,  $J = 7.9, 0.7$  Hz, 1H), 7.35 (dd,  $J = 8.7, 2.4$  Hz, 1H), 7.27 (td,  $J = 7.9, 0.8$  Hz, 1H);  $^{19}\text{F}$  NMR ( $d_6$ -DMSO, 564 MHz):  $\delta$  -114.1 (m, 1F);  $^{13}\text{C}$  NMR ( $d_6$ -DMSO, 150 MHz):  $\delta$  160.8 (d,  $J_{1\text{F}} = 241.5$  Hz), 154.0, 138.5, 132.2, 130.7 (d,  $J_{3\text{F}} = 8.0$  Hz), 127.4 (d,  $J_{4\text{F}} = 3.3$  Hz), 124.8, 124.8 (d,  $J_{3\text{F}} = 9.0$  Hz), 123.5, 123.4, 123.2, 121.3, 120.0, 119.8, 118.4, 115.6 (d,  $J_{2\text{F}} = 23.6$  Hz), 111.8, 111.3, 109.3 (d,  $J_{2\text{F}} = 22.3$  Hz), 108.7.

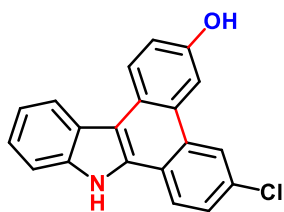

6-chloro-9H-dibenzo[*a,c*]carbazol-3-ol (**3k**).<sup>3</sup> **Condition A**, 48 h, yield: 60%, gray solid. <sup>1</sup>H NMR (*d*<sub>6</sub>-DMSO, 600 MHz): δ 12.26 (s, 1H), 9.67 (s, 1H), 8.70 (s, 1H), 8.67 (d, *J* = 8.7 Hz, 1H), 8.56 (d, *J* = 8.5 Hz, 1H), 8.50 (d, *J* = 8.0 Hz, 1H), 8.14 (s, 1H), 7.80 (dd, *J* = 8.6, 1.7 Hz, 1H), 7.68 (d, *J* = 8.1 Hz, 1H), 7.40 (t, *J* = 7.6 Hz, 1H), 7.37 – 7.36 (m, 1H), 7.28 (t, *J* = 7.9 Hz, 1H); <sup>13</sup>C NMR (*d*<sub>6</sub>-DMSO, 150 MHz): δ 154.2, 138.6, 131.9, 130.9, 130.1, 127.1, 127.0, 124.9, 124.3, 123.8, 123.4, 123.3, 123.2, 121.6, 121.4, 119.9, 118.4, 112.2, 111.8, 108.4.

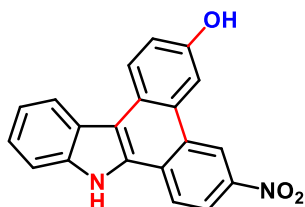

6-nitro-9H-dibenzo[*a,c*]carbazol-3-ol (**3l**). **Condition A**, 48 h, yield: 62%, yellow solid. <sup>1</sup>H NMR (*d*<sub>6</sub>-DMSO, 600 MHz): δ 12.42 (s, 1H), 9.83 (s, 1H), 9.42 (d, *J* = 1.9 Hz, 1H), 8.69 (d, *J* = 8.8 Hz, 1H), 8.65 (d, *J* = 8.9 Hz, 1H), 8.53 (d, *J* = 8.1 Hz, 1H), 8.48 (dd, *J* = 8.9, 2.1 Hz, 1H), 8.17 (d, *J* = 2.2 Hz, 1H), 7.69 (d, *J* = 8.2 Hz, 1H), 7.46 (t, *J* = 7.6 Hz, 1H), 7.38 (dd, *J* = 8.6, 2.2 Hz, 1H), 7.31 (t, *J* = 7.6 Hz, 1H); <sup>13</sup>C NMR (*d*<sub>6</sub>-DMSO, 150 MHz): δ 154.7, 144.6, 139.4, 131.1, 127.8, 127.7, 126.7, 125.3, 125.0, 123.6, 123.0, 122.8, 122.0, 120.7, 120.2, 119.8, 118.9, 115.2, 112.1, 108.2. HRMS (ESI) calcd. for C<sub>20</sub>H<sub>11</sub>N<sub>2</sub>O<sub>3</sub> [M–H]<sup>–</sup>: 327.0775, found: 327.0769.

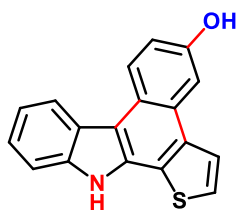

12H-benzo[*c*]thieno[2,3-*a*]carbazol-5-ol (**3m**).<sup>3</sup> **Condition A**, 52 h, yield: 53%, gray solid. <sup>1</sup>H NMR (*d*<sub>6</sub>-DMSO, 600 MHz): δ 12.10 (s, 1H), 9.69 (s, 1H), 8.68 (d, *J* = 8.8 Hz, 1H), 8.50 (d, *J* = 8.0 Hz, 1H), 7.98 (d, *J* = 5.2 Hz, 1H), 7.91 (d, *J* = 5.3 Hz, 1H), 7.65 (d, *J* = 8.0 Hz, 1H), 7.49 (d, *J* = 2.3 Hz, 1H), 7.38 (t, *J* = 7.4 Hz, 1H), 7.29 (t, *J* = 7.5 Hz, 1H), 7.25 (dd, *J* = 8.8, 2.4 Hz, 1H); <sup>13</sup>C NMR (*d*<sub>6</sub>-DMSO, 150 MHz): δ 153.6, 138.0, 134.9, 131.5, 126.6, 126.4, 125.8, 125.4, 123.4,

123.3, 122.2, 121.3, 121.1, 119.6, 117.6, 111.7, 111.6, 107.4.

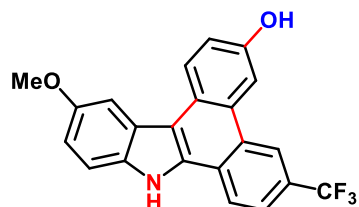

12-methoxy-6-(trifluoromethyl)-9H-dibenzo[*a,c*]carbazol-3-ol (**3n**). **Condition A**, 48 h, yield: 61%, white solid.  $^1\text{H}$  NMR ( $d_6$ -DMSO, 600 MHz):  $\delta$  12.26 (s, 1H), 9.71 (s, 1H), 8.68 (t,  $J = 9.1$  Hz, 1H), 8.22 (s, 1H), 8.04 (d,  $J = 8.3$  Hz, 1H), 7.95 (s, 1H), 7.61 (d,  $J = 8.7$  Hz, 1H), 7.39 (d,  $J = 8.4$  Hz, 1H), 7.11 (d,  $J = 8.6$  Hz, 1H), 3.95 (s, 3H);  $^{19}\text{F}$  NMR ( $d_6$ -DMSO, 564 MHz):  $\delta$  -60.0 (s, 3F);  $^{13}\text{C}$  NMR ( $d_6$ -DMSO, 150 MHz):  $\delta$  154.2 (d,  $J_{2\text{F}} = 33.0$  Hz), 134.0, 132.0, 128.0, 127.3, 125.8, 125.8 (q,  $J_{1\text{F}} = 31.5$  Hz), 125.5, 125.1, 124.0, 123.5, 123.2, 123.2, 122.7, 121.0, 118.5, 114.4, 113.6, 112.7, 108.3, 103.9, 55.9. HRMS (ESI) calcd. for  $\text{C}_{22}\text{H}_{13}\text{F}_3\text{NO}_2$  [ $\text{M}-\text{H}$ ] $^-$ : 380.0904, found: 380.0895.

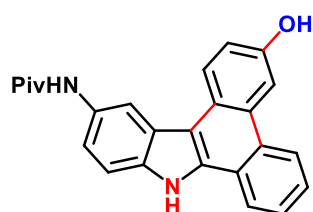

N-(3-hydroxy-9H-dibenzo[*a,c*]carbazol-12-yl)pivalamide (**3o**). **Condition A**, 45.5 h, yield: 64%, white solid.  $^1\text{H}$  NMR ( $d_6$ -DMSO, 600 MHz):  $\delta$  12.10 (s, 1H), 9.64 (s, 1H), 9.26 (s, 1H), 8.76 (s, 1H), 8.68 (d,  $J = 8.3$  Hz, 1H), 8.50 (t,  $J = 8.3$  Hz, 1H), 8.15 (d,  $J = 2.2$  Hz, 1H), 7.91 (d,  $J = 5.3$  Hz, 1H), 7.73 (t,  $J = 7.4$  Hz, 1H), 7.70 (dd,  $J = 8.7, 1.6$  Hz, 1H), 7.66 (t,  $J = 8.0$  Hz, 1H), 7.58 (d,  $J = 8.6$  Hz, 1H), 7.34 (dd,  $J = 8.6, 2.3$  Hz, 1H), 1.30 (s, 9H);  $^{13}\text{C}$  NMR ( $d_6$ -DMSO, 150 MHz):  $\delta$  176.3, 153.9, 135.2, 133.1, 132.2, 128.7, 127.9, 127.0, 126.1, 124.2, 123.9, 123.1, 123.0, 122.8, 122.3, 118.2, 117.5, 112.9, 111.6, 111.2, 108.3, 78.4, 27.6. HRMS (ESI) calcd. for  $\text{C}_{25}\text{H}_{21}\text{N}_2\text{O}_2$  [ $\text{M}-\text{H}$ ] $^-$ : 381.1608, found: 381.1601.

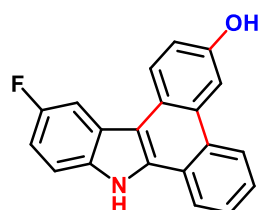

12-fluoro-9H-dibenzo[*a,c*]carbazol-3-ol (**3p**).<sup>3</sup> **Condition A**, 62 h, yield: 76%, white solid.  $^1\text{H}$

NMR ( $d_6$ -DMSO, 600 MHz):  $\delta$  12.28 (s, 1H), 9.65 (s, 1H), 8.70 (d,  $J$  = 8.3 Hz, 1H), 8.59 (d,  $J$  = 8.8 Hz, 1H), 8.52 (dd,  $J$  = 8.0, 0.7 Hz, 1H), 8.28 (dd,  $J$  = 10.5, 2.2 Hz, 1H), 8.15 (d,  $J$  = 2.3 Hz, 1H), 7.74 (td,  $J$  = 7.7, 0.7 Hz, 1H), 7.70 – 7.65 (m, 2H), 7.33 (dd,  $J$  = 8.6, 2.3 Hz, 1H), 7.24 (td,  $J$  = 9.1, 2.4 Hz, 1H);  $^{19}\text{F}$  NMR ( $d_6$ -DMSO, 564 MHz):  $\delta$  -123.6 (m, 1F);  $^{13}\text{C}$  NMR ( $d_6$ -DMSO, 150 MHz):  $\delta$  157.3 (d,  $J_{1\text{F}}$  = 230.3 Hz), 154.1, 135.1, 134.1, 129.1, 127.9, 127.0, 126.5, 124.8, 123.9, 123.4 (d,  $J_{3\text{F}}$  = 9.9 Hz), 123.0, 122.4, 117.7, 115.7, 112.6 (d,  $J_{3\text{F}}$  = 9.6 Hz), 111.8 (d,  $J_{4\text{F}}$  = 4.4 Hz), 111.4 (d,  $J_{2\text{F}}$  = 25.5 Hz), 108.3, 106.5 (d,  $J_{2\text{F}}$  = 24.2 Hz).

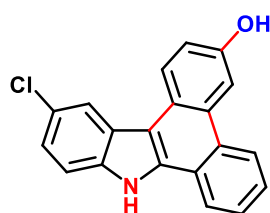

12-chloro-9H-dibenzo[*a,c*]carbazol-3-ol (**3q**).<sup>3</sup> **Condition A**, 62 h, yield: 60%, white solid.  $^1\text{H}$  NMR ( $d_6$ -DMSO, 600 MHz):  $\delta$  12.39 (s, 1H), 9.66 (s, 1H), 8.70 (d,  $J$  = 8.3 Hz, 1H), 8.60 (d,  $J$  = 8.8 Hz, 1H), 8.52 – 8.51 (m, 2H), 8.14 (d,  $J$  = 2.3 Hz, 1H), 7.75 (t,  $J$  = 7.7 Hz, 1H), 7.70 (td,  $J$  = 8.1, 1.0 Hz, 1H), 7.68 (d,  $J$  = 8.6 Hz, 1H), 7.40 (dd,  $J$  = 8.5, 1.9 Hz, 1H), 7.33 (dd,  $J$  = 8.6, 2.4 Hz, 1H);  $^{13}\text{C}$  NMR ( $d_6$ -DMSO, 150 MHz):  $\delta$  154.3, 137.0, 133.7, 129.1, 128.1, 127.1, 126.6, 124.9, 124.4, 124.2, 124.0, 123.4, 122.8, 122.4, 122.2, 120.4, 117.8, 113.2, 111.2, 108.3.

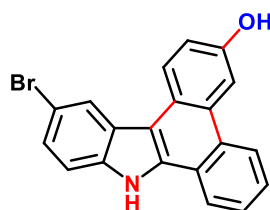

12-bromo-9H-dibenzo[*a,c*]carbazol-3-ol (**3r**).<sup>3</sup> **Condition A**, 62 h, yield: 58%, gray solid.  $^1\text{H}$  NMR ( $d_6$ -DMSO, 600 MHz):  $\delta$  12.40 (s, 1H), 9.66 (s, 1H), 8.70 (d,  $J$  = 8.3 Hz, 1H), 8.64 (d,  $J$  = 1.4 Hz, 1H), 8.59 (d,  $J$  = 8.8 Hz, 1H), 8.51 (d,  $J$  = 7.1 Hz, 1H), 8.14 (d,  $J$  = 2.3 Hz, 1H), 7.75 (t,  $J$  = 7.7 Hz, 1H), 7.69 (t,  $J$  = 8.0 Hz, 1H), 7.63 (d,  $J$  = 8.5 Hz, 1H), 7.51 (dd,  $J$  = 8.5, 1.7 Hz, 1H), 7.33 (dd,  $J$  = 8.6, 2.2 Hz, 1H);  $^{13}\text{C}$  NMR ( $d_6$ -DMSO, 150 MHz):  $\delta$  154.3, 137.2, 133.5, 129.1, 128.1, 127.1, 126.7, 126.0, 125.1, 124.9, 124.0, 123.3, 122.8, 122.4, 122.2, 117.8, 113.6, 112.1, 111.1, 108.3.

## References

1. C. White, A. Yates and P. M. Maitlis, *Inorg. Syn.*, 1992, **29**, 228.
2. X. Yu, E.-J. Park, T. P. Kondratyuk, J. M. Pezzuto and D. Sun, *Org. Biomol. Chem.*, 2012, **10**, 8835.
3. S. Guo, Y. Liu, L. Zhao, X. Zhang and X. Fan, *Org. Lett.*, 2019, **21**, 6437.

# NMR Spectra Images of Products

PROTON\_01  
r/Wang\_CMW-296

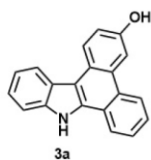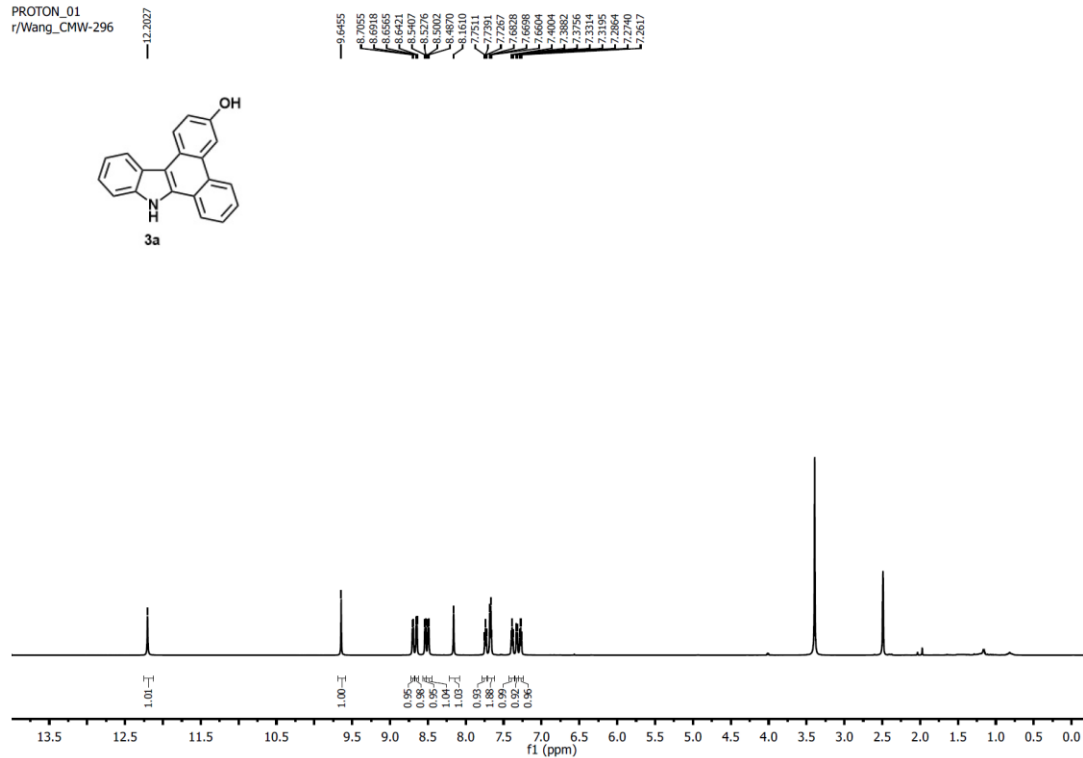

CARBON\_01  
r/Wang\_CMW-296

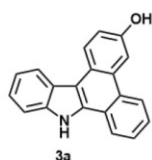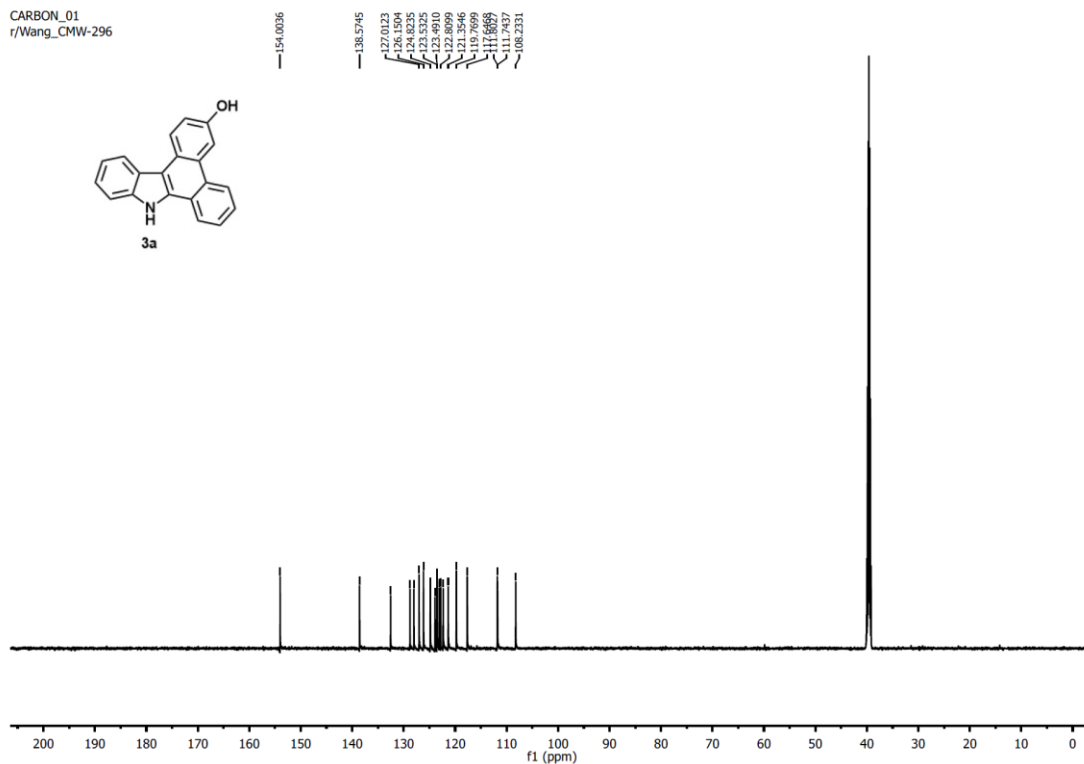

PROTON\_01  
r/Wang\_CMW-344

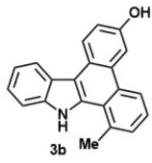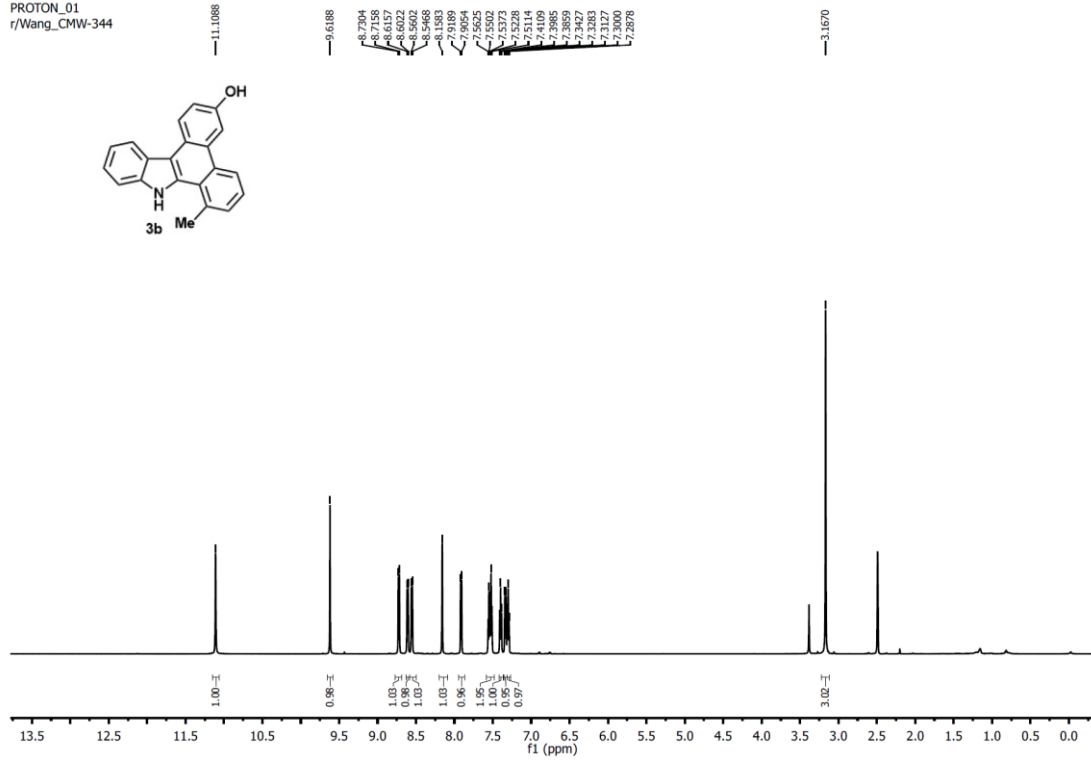

CARBON\_01  
r/Wang\_CMW-344

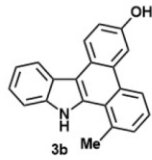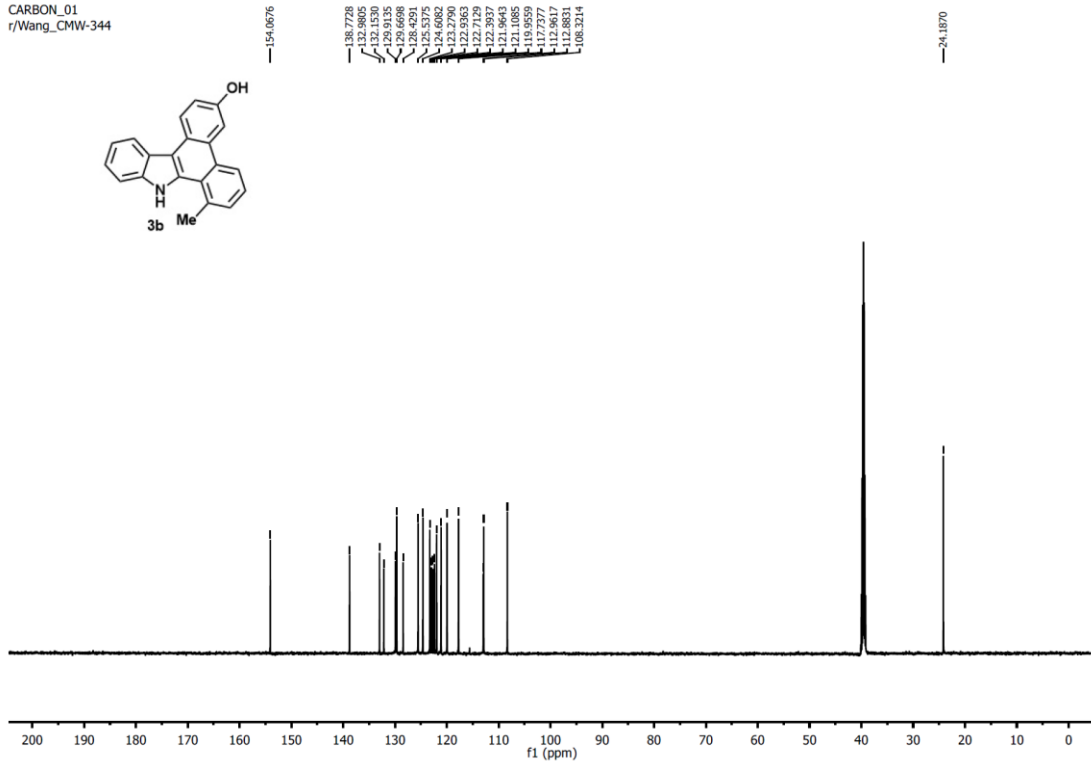



PROTON\_01  
r/Wang\_CMW-350

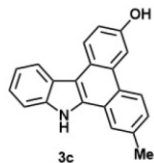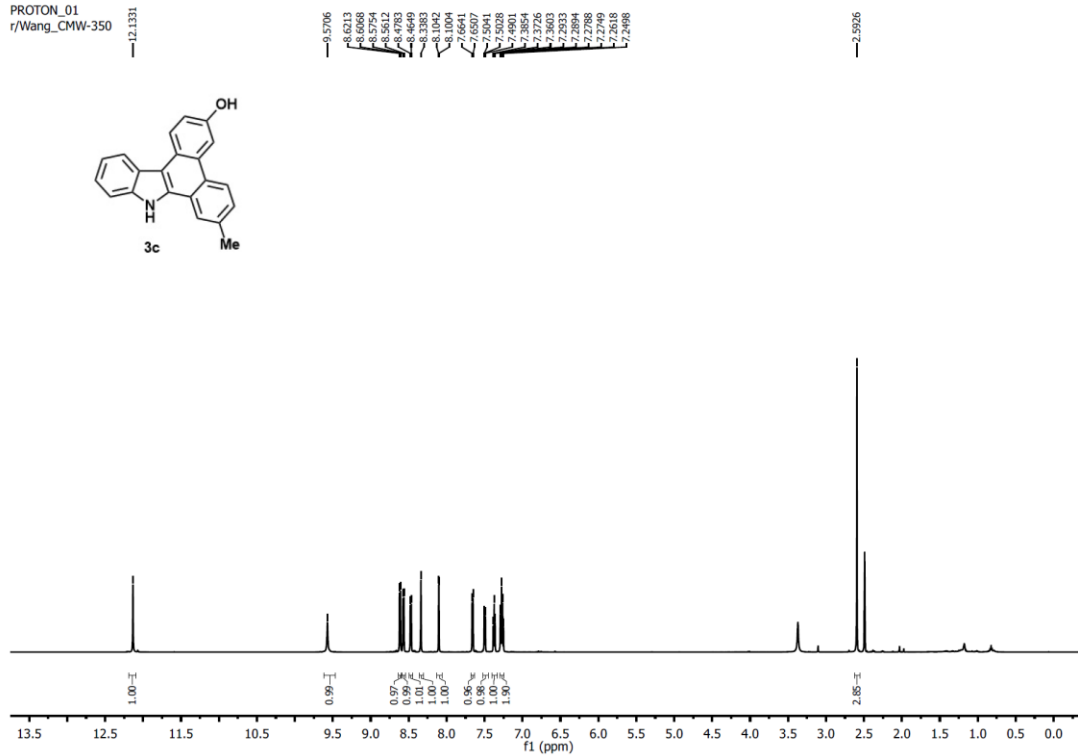

CARBON\_01  
r/Wang\_CMW-350

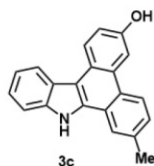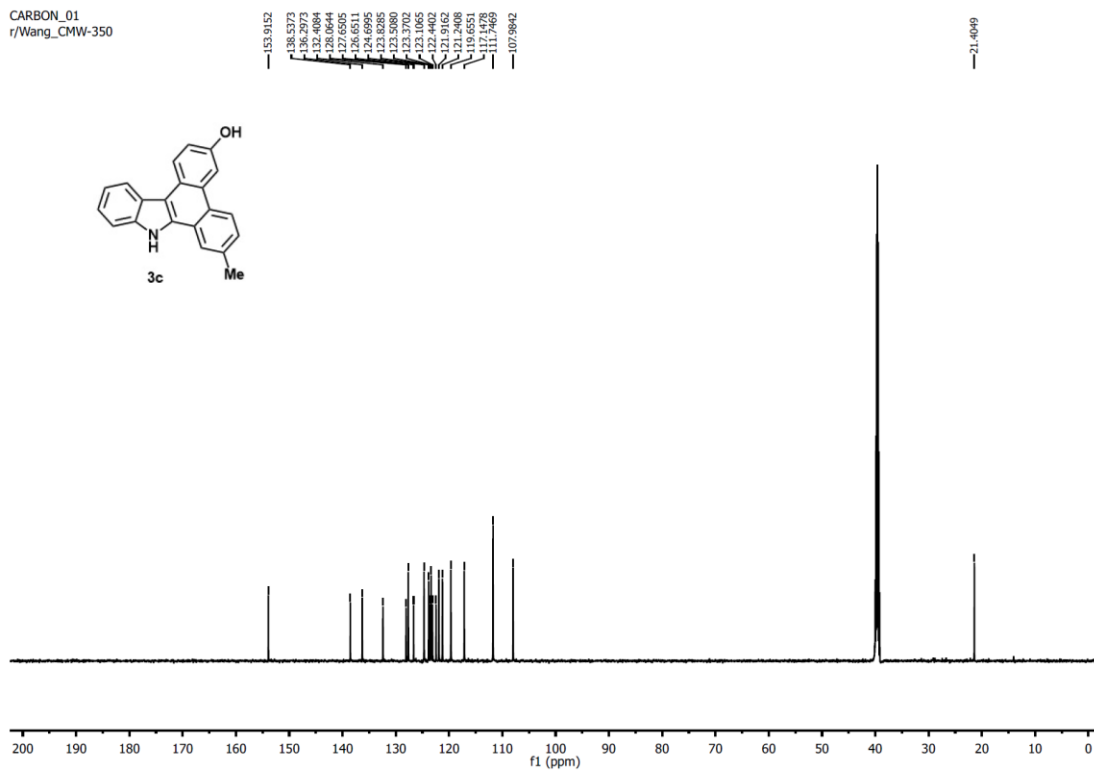

PROTON\_01  
r/wang\_cmw347

12.1245  
12.0707

9.5337  
9.4073  
9.3106  
9.2103  
8.5193  
8.4997  
8.5776  
8.4760  
8.0567  
8.0465  
8.0437  
7.6293  
7.6668  
7.3906  
7.2928  
7.2859  
7.2837  
7.2832

4.1211  
4.0068

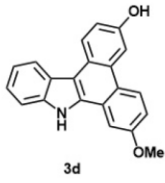

and

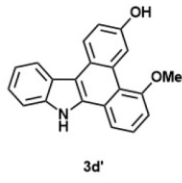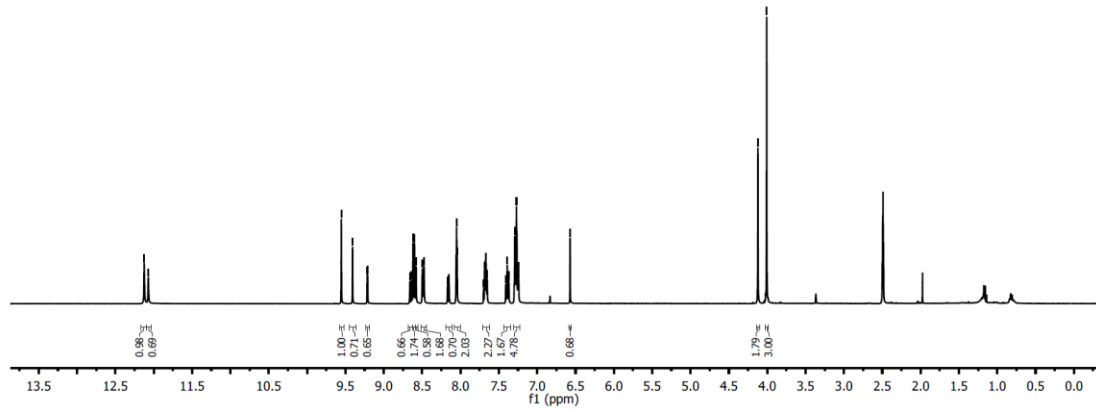

CARBON\_01  
r/wang\_cmw347

159.6469  
158.4489  
154.4399  
154.0006  
153.2896  
149.8216

138.8279  
138.4943  
132.6915  
132.6915  
127.8714  
127.3862  
125.6982  
124.7000  
124.3216  
123.8758  
123.6996  
123.2290  
122.8143  
121.7118  
121.4599  
118.6856  
118.6896  
116.5407  
116.3499  
115.7921  
115.7921  
114.7787  
114.4095  
112.2708  
112.1190  
111.6818  
108.7318  
107.6656  
103.6379  
55.5849

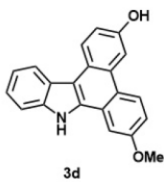

and

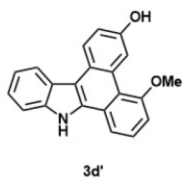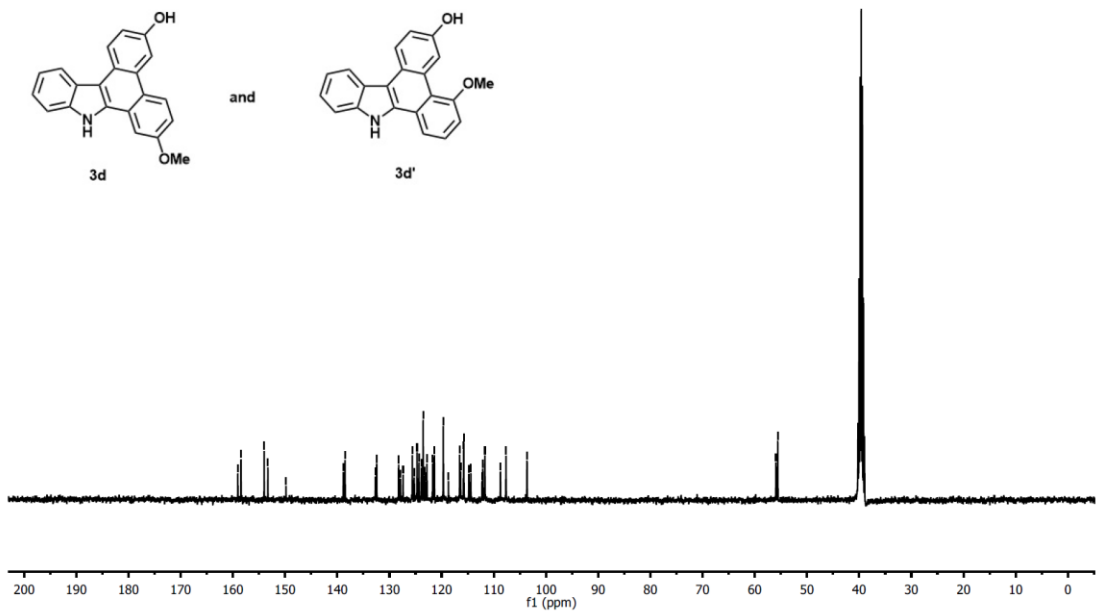

PROTON\_01  
r/Wang\_CMW-349

12.1173

9.5581  
8.6256  
8.6110  
8.4957  
8.4852  
8.4376  
8.4240  
8.1568  
8.0003  
7.6470  
7.5814  
7.5680  
7.3658  
7.3540  
7.3177  
7.3140  
7.2853  
7.2803  
7.2731  
7.2605  
7.2484

2.6074

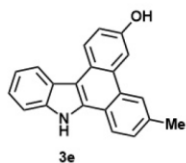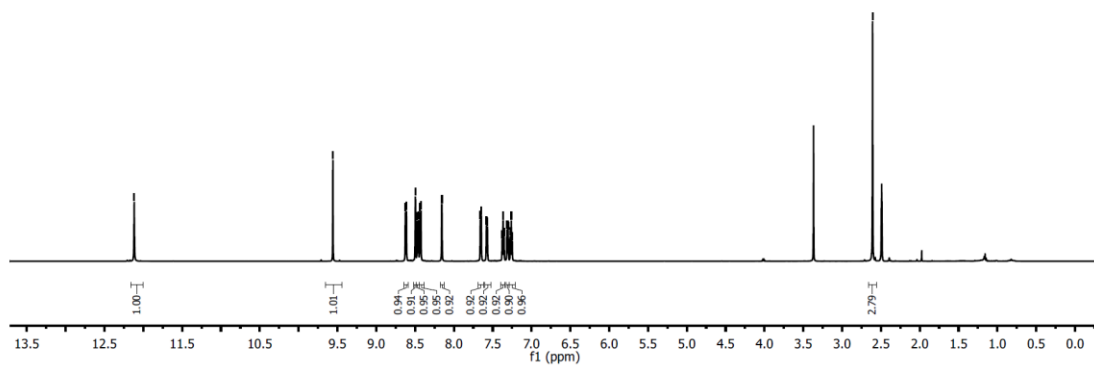

CARBON\_01  
r/Wang\_CMW-349

153.8489  
138.4225  
135.3727  
128.9171  
128.4408  
124.6997  
123.6458  
123.5692  
123.2247  
122.9697  
122.2687  
121.1289  
120.9097  
119.6540  
111.0705  
108.2351

21.7553

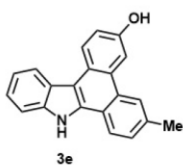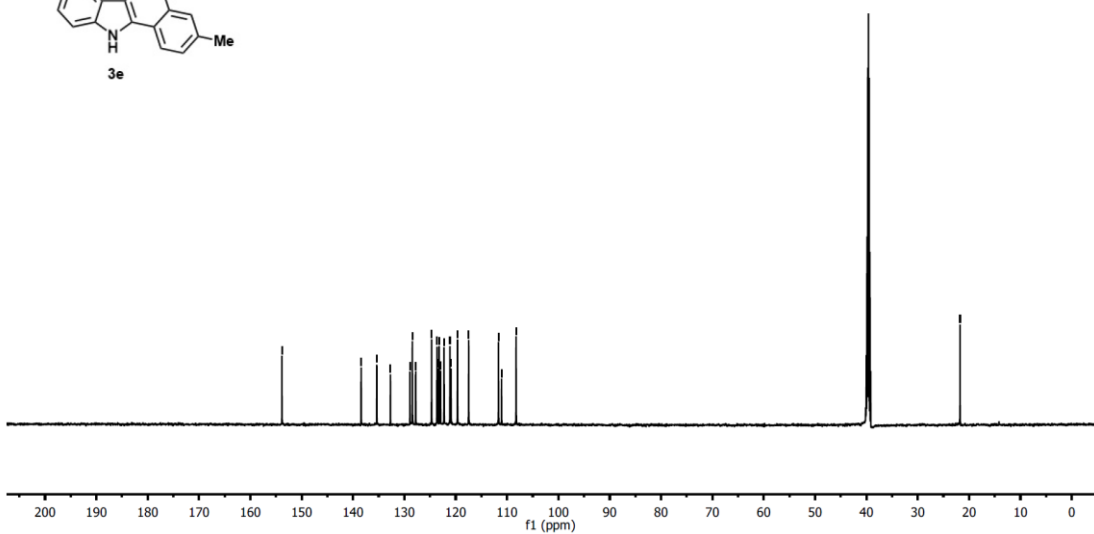

PROTON\_01  
r/wang\_cmw352

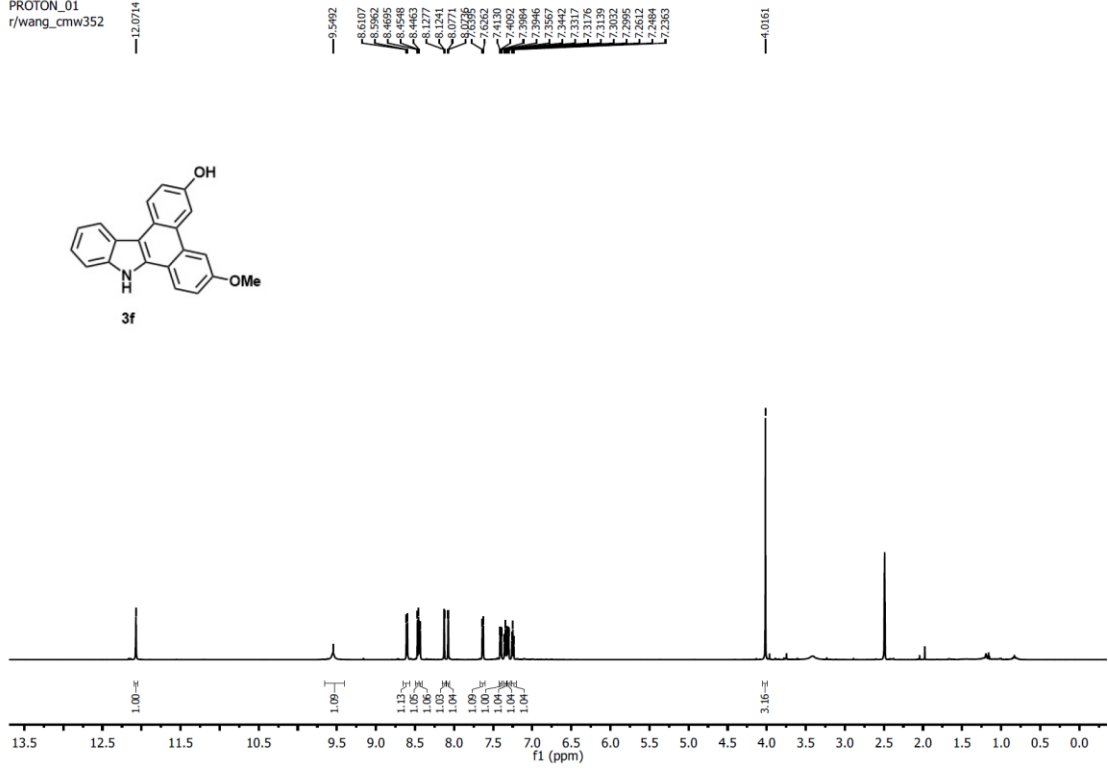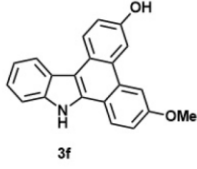

CARBON\_01  
r/wang\_cmw352

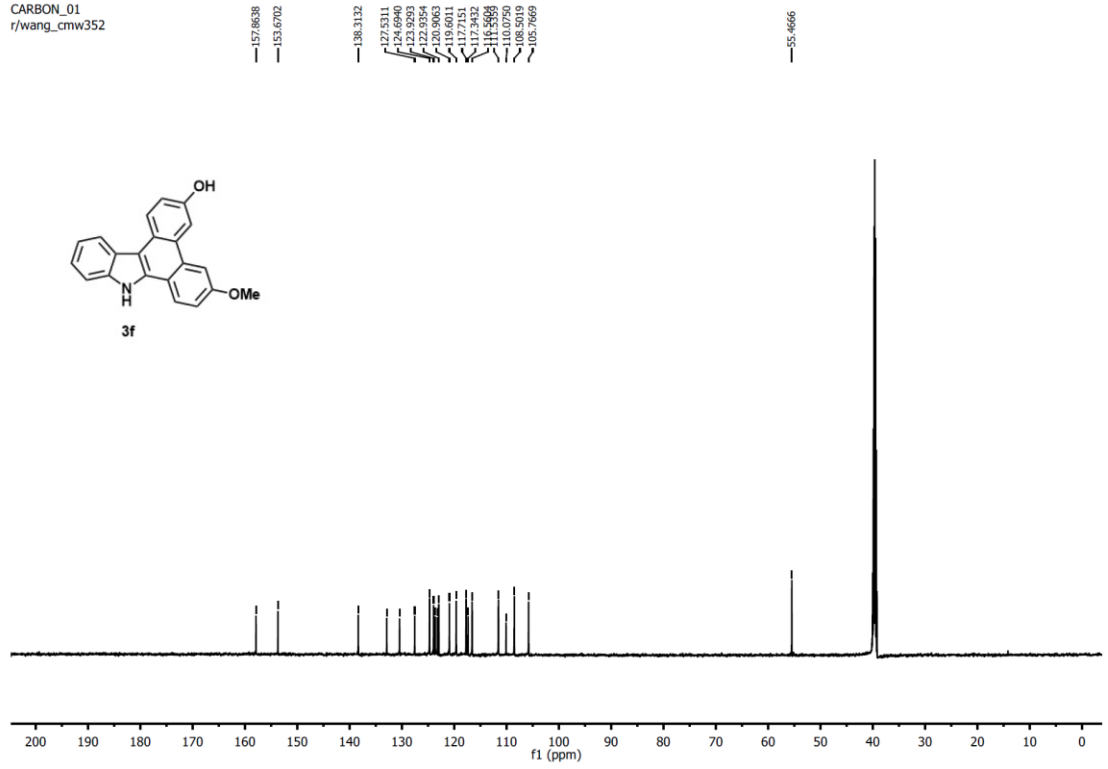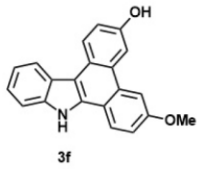

PROTON\_01  
r/Wang\_CMW-343

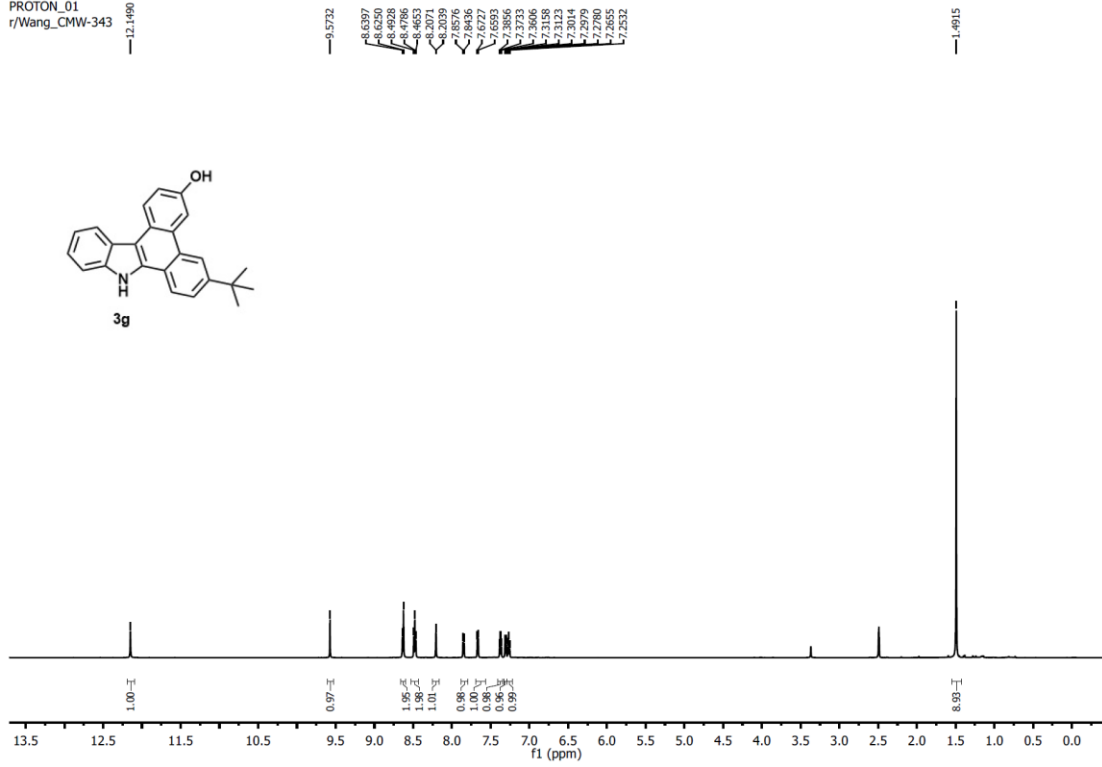

CARBON\_01  
r/Wang\_CMW-343

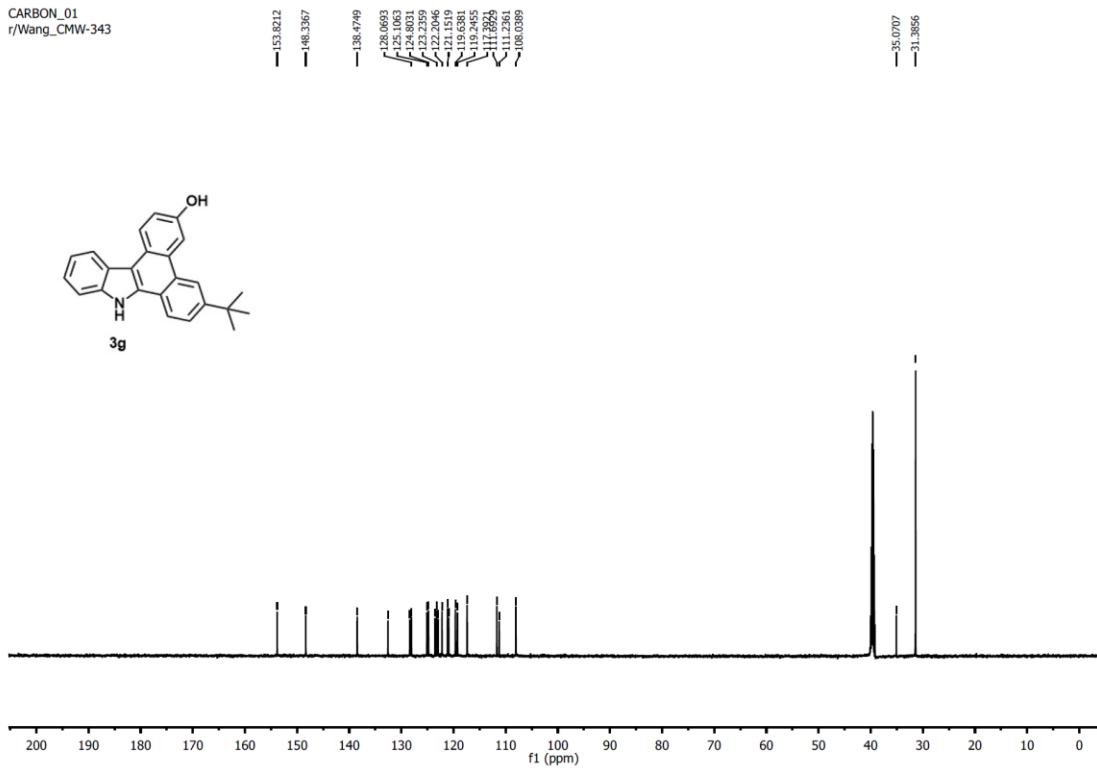

PROTON\_01  
r/Wang\_CMW-373

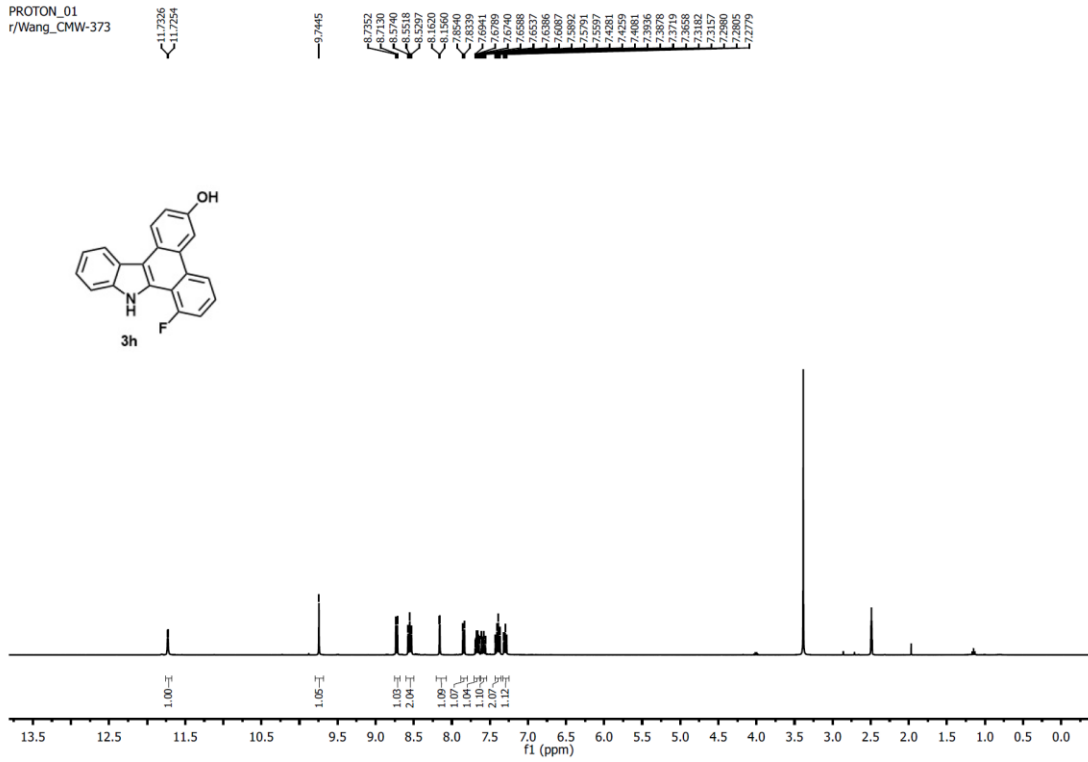

FLUORINE\_01  
r/Wang\_CMW-372

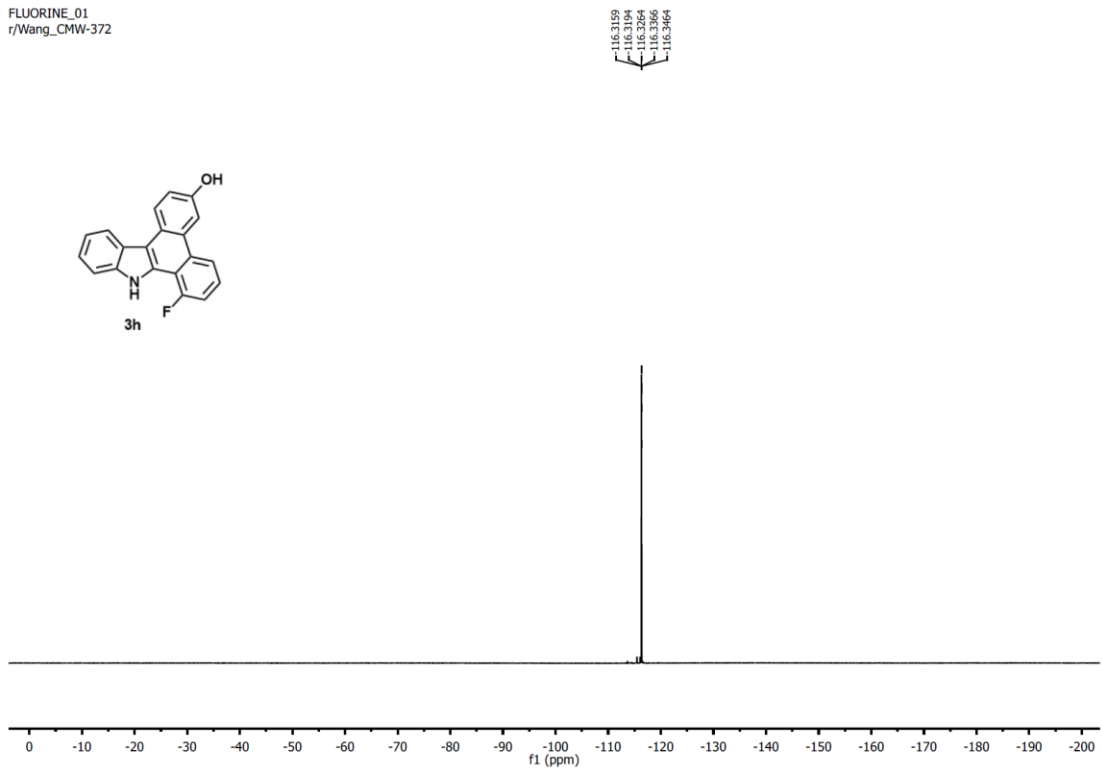

CARBON\_01  
r/Wang\_CMW-372

159.1593  
157.5246  
154.3156  
138.9252  
138.9106  
125.0291  
123.7347  
122.1657  
121.2168  
119.9998  
119.9783  
112.5755  
112.5699  
112.3424  
112.2085  
108.5670

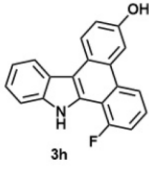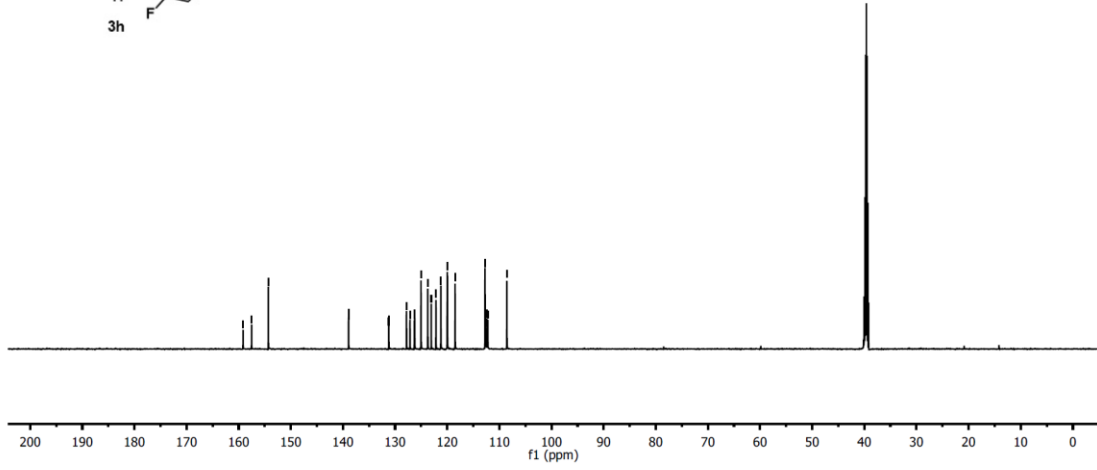

PROTON\_01  
r/Wang\_CMW-372

12.3933  
8.7986  
8.6666  
8.6482  
8.6451  
8.6053  
8.1755  
8.1197  
8.0606  
7.7705  
7.7655  
7.6774  
7.6673  
7.6275  
7.4985  
7.3899  
7.3607  
7.3500  
7.3380  
7.3333  
7.3042  
7.2949  
7.2669

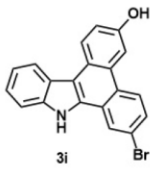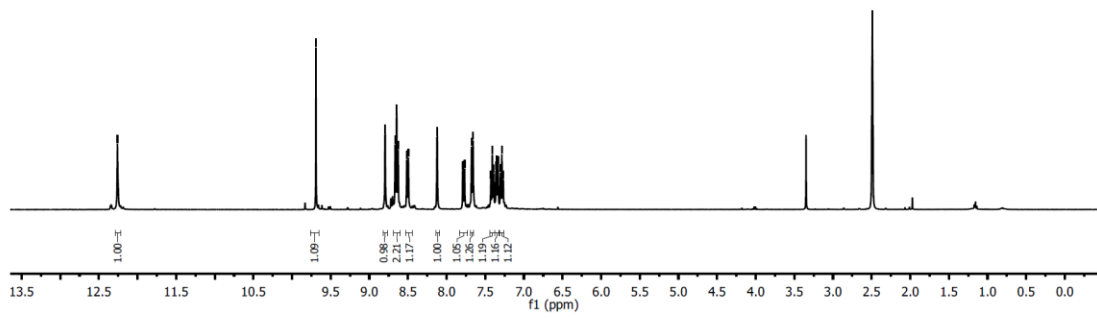

CARBON\_01  
r/Wang\_CMW-374

154.2344  
138.6722  
137.5286  
136.6722  
124.9525  
124.5904  
124.5388  
122.9864  
119.9256  
118.8800  
111.8804  
108.1963

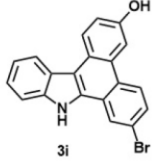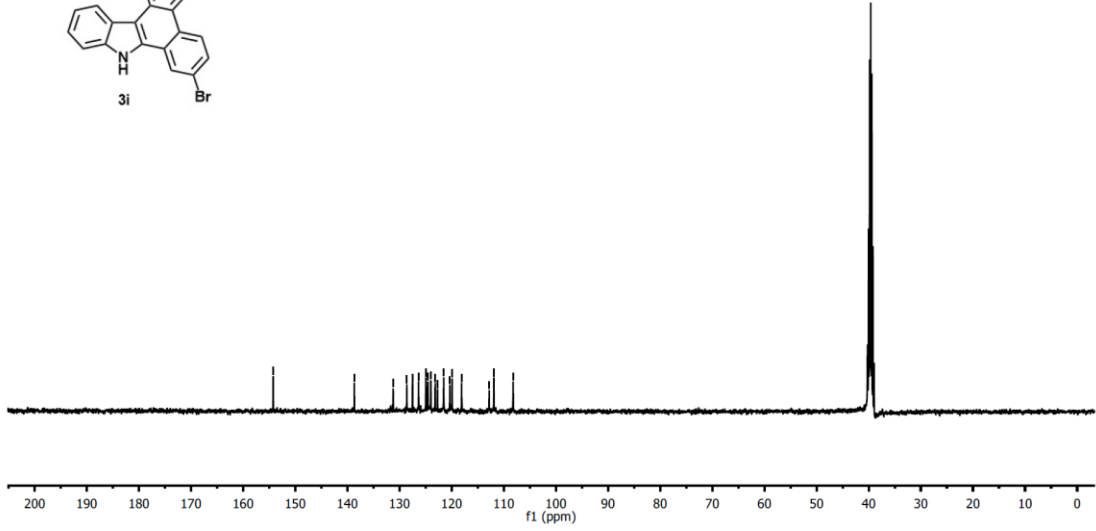

PROTON\_01  
r/Wang\_CMW-335

9.6518  
8.6505  
8.6359  
8.5919  
8.5771  
8.5671  
8.4896  
8.4763  
8.4660  
8.4660  
8.0841  
7.6689  
7.6556  
7.6477  
7.6438  
7.6334  
7.5974  
7.5924  
7.3960  
7.3840  
7.3720  
7.3708  
7.3554  
7.3544  
7.3439  
7.3399  
7.2871  
7.2858  
7.2789  
7.2621  
7.2606

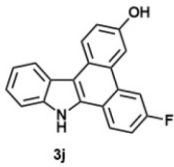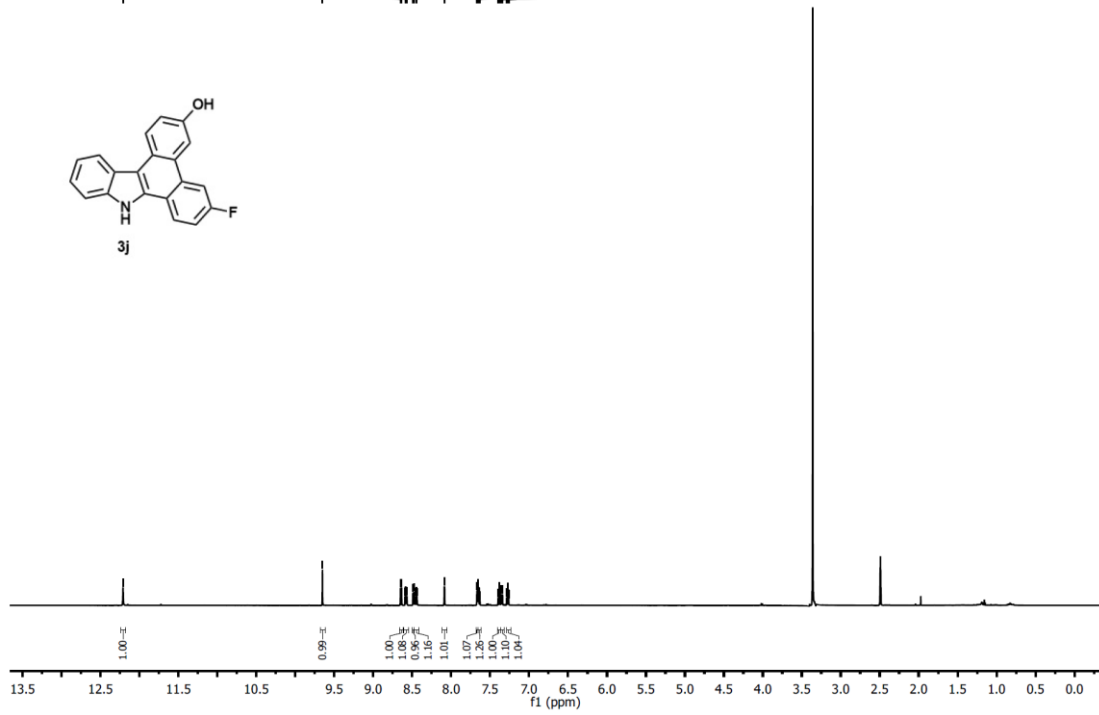



FLUORINE\_01  
r/Wang\_CMW-335

114.0671  
114.0787  
114.0800  
114.0987  
114.1125

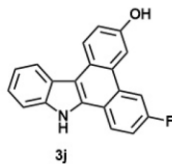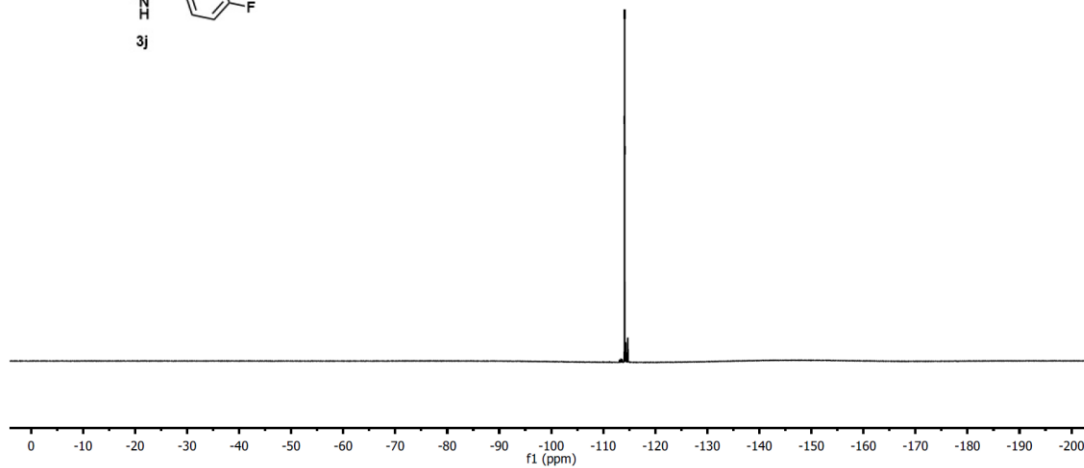

CARBON\_01  
r/Wang\_CMW-335

161.5694  
159.9634  
153.9706  
138.4837  
132.2023  
131.6659  
130.6090  
127.9964  
127.3742  
124.8364  
124.8364  
124.8364  
123.5284  
123.3859  
123.1725  
123.1725  
119.9700  
119.8311  
118.3531  
115.6757  
115.2960  
111.3123  
109.3542  
109.2057  
108.7008

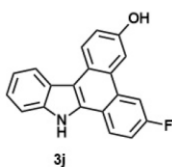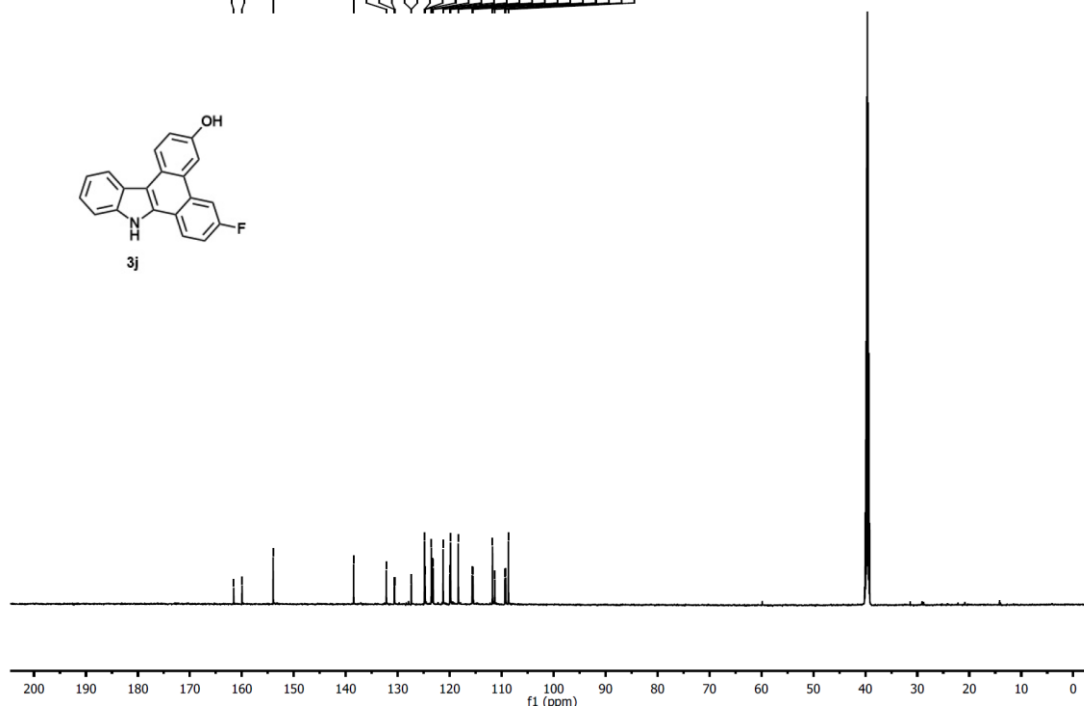

PROTON\_01  
r/Wang\_CMW-339

12.2621

9.6662  
8.7049  
8.6695  
8.6550  
8.5518  
8.4932  
8.1363  
7.8034  
7.8005  
7.7971  
7.7861  
7.6809  
7.6674  
7.4151  
7.3900  
7.3742  
7.2720  
7.2681  
7.2653  
7.2622  
7.2702

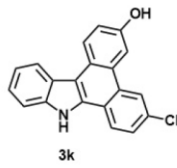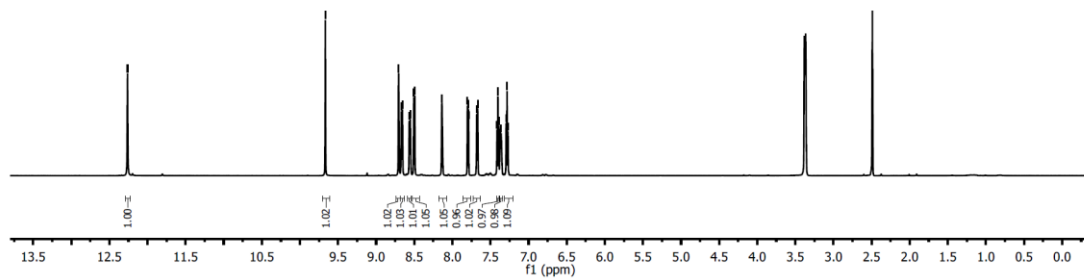

CARBON\_01  
r/Wang\_CMW-339

154.1752

138.6461  
130.8678  
127.1038  
124.8974  
124.3356  
123.8729  
121.4206  
119.9080  
118.8878  
118.8878  
111.8456  
108.4363

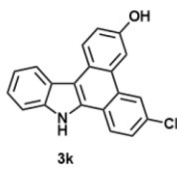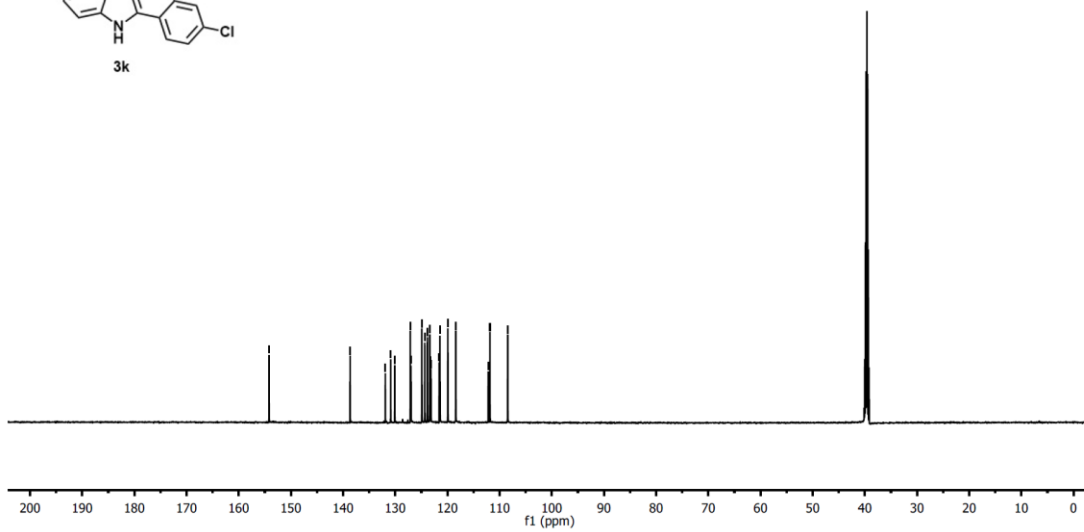

PROTON\_01  
r/Wang\_CMW-367

9.8313  
9.4167  
9.4135  
8.6909  
8.6762  
8.6591  
8.6443  
8.5235  
8.4172  
8.1676  
7.7278  
7.7261  
7.4478  
7.3832  
7.3788  
7.3688  
7.3650  
7.3216  
7.3089  
7.2967

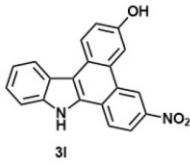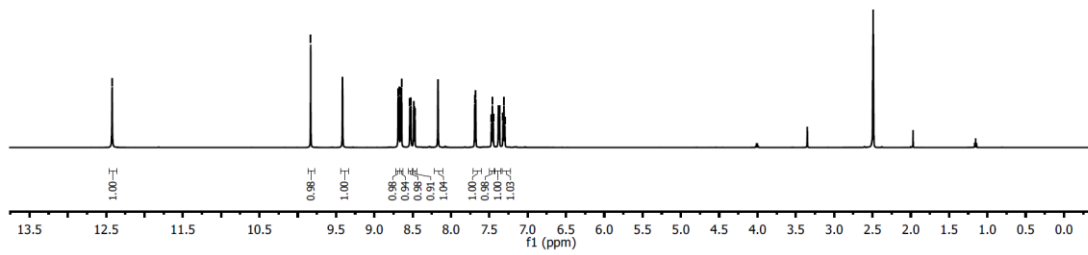

CARBON\_01  
r/Wang\_CMW-367

154.7351  
144.6025  
139.4243  
131.1101  
127.8169  
127.7389  
126.9722  
125.9332  
125.0002  
123.6166  
122.9899  
122.8386  
122.7488  
120.2436  
119.7911  
118.9941  
118.7468  
112.1411  
108.1943

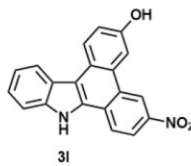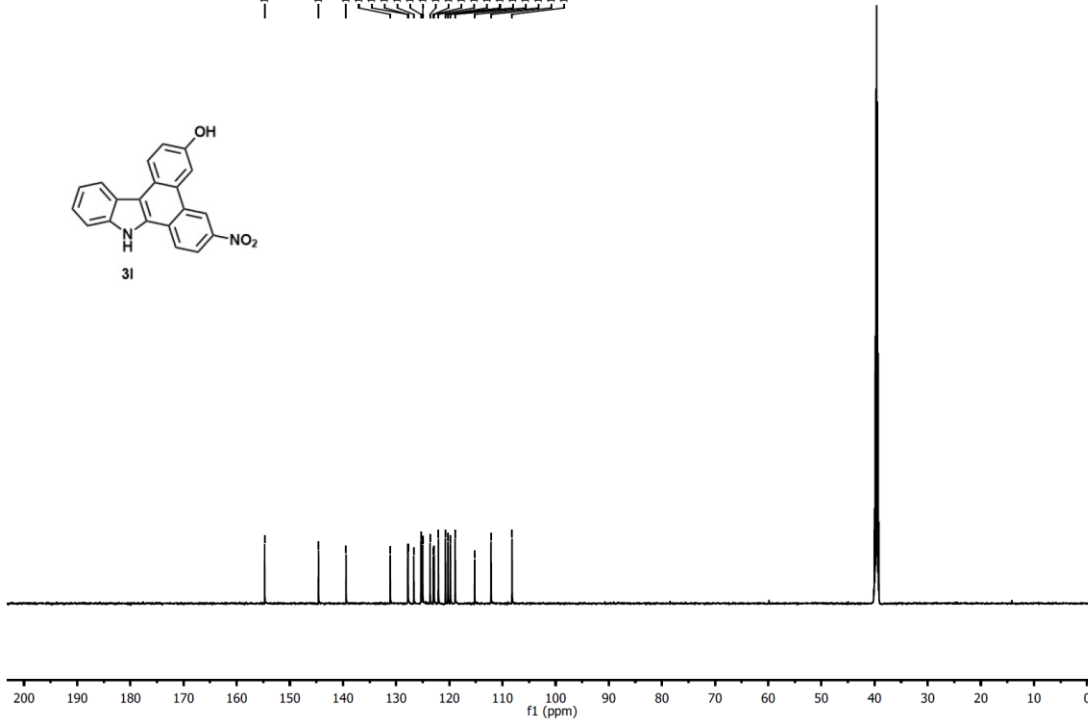

PROTON\_01  
r/Wang\_CMW-332

12.1029

9.6916

8.6572  
8.6275  
8.5031  
8.4888  
7.9905  
7.9448  
7.9095  
7.8955  
7.6536  
7.6402  
7.4851  
7.3941  
7.3817  
7.3690  
7.2864  
7.2800  
7.2556  
7.2449  
7.2409

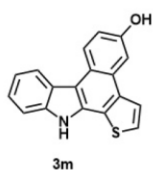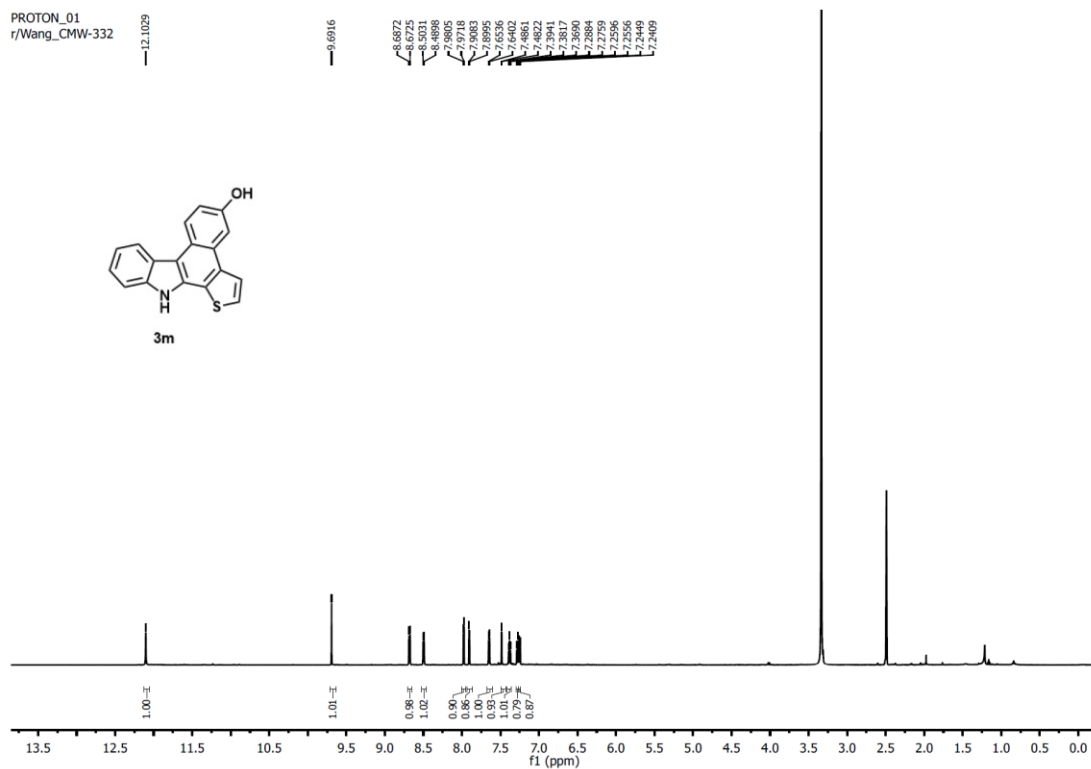

CARBON\_01  
r/Wang\_CMW-332

153.6226

137.9925  
134.8985  
132.8048  
126.5018  
125.7527  
125.4423  
123.9695  
123.3042  
122.1902  
121.2918  
121.0607  
117.6340  
117.6333  
111.6495  
107.3984

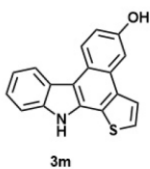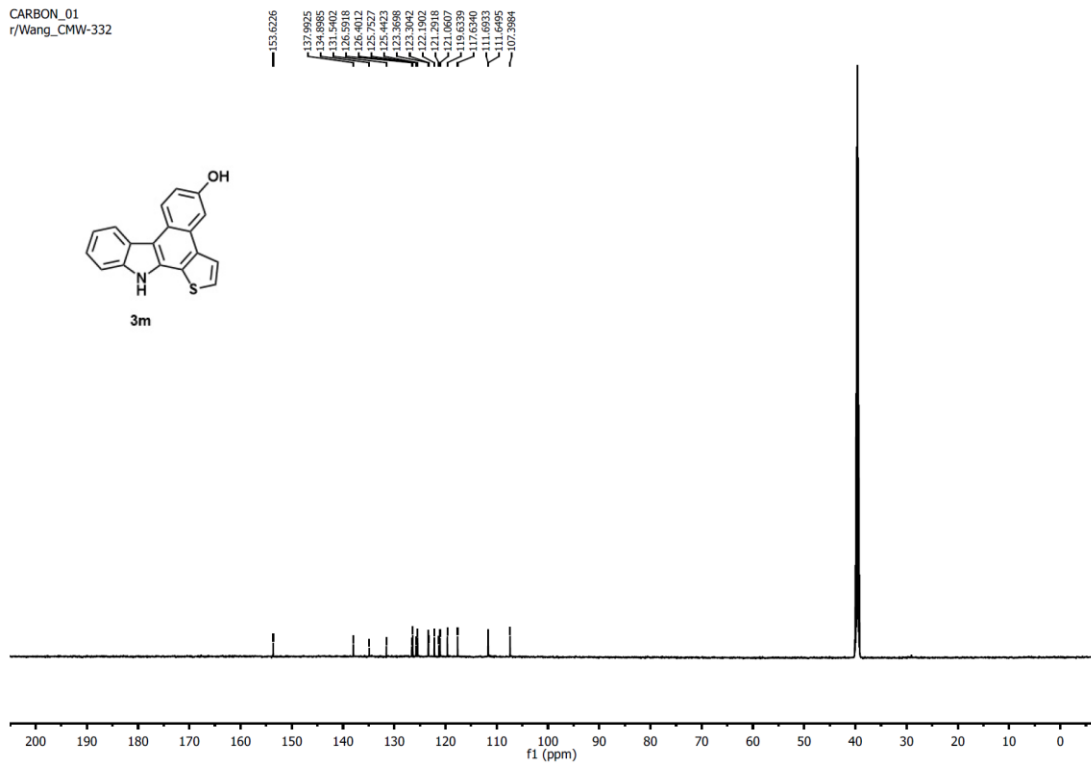

PROTON\_01  
r/Wang\_CMW-342

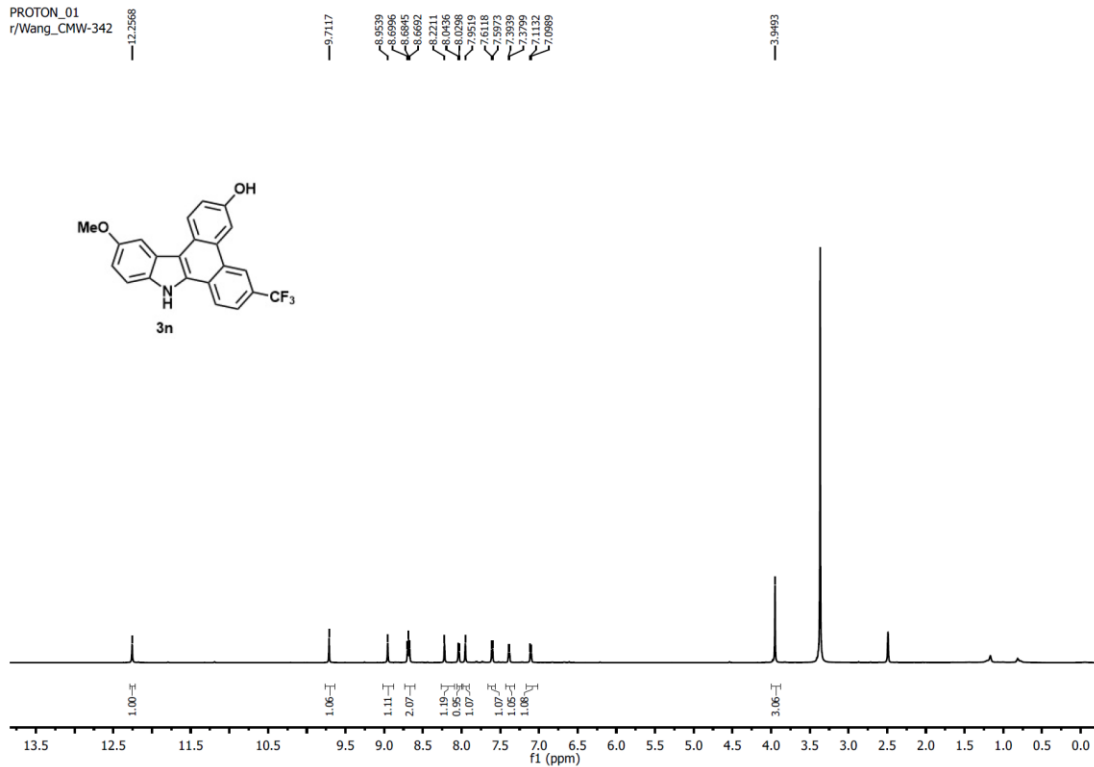

FLUORINE\_01  
r/Wang\_CMW-342

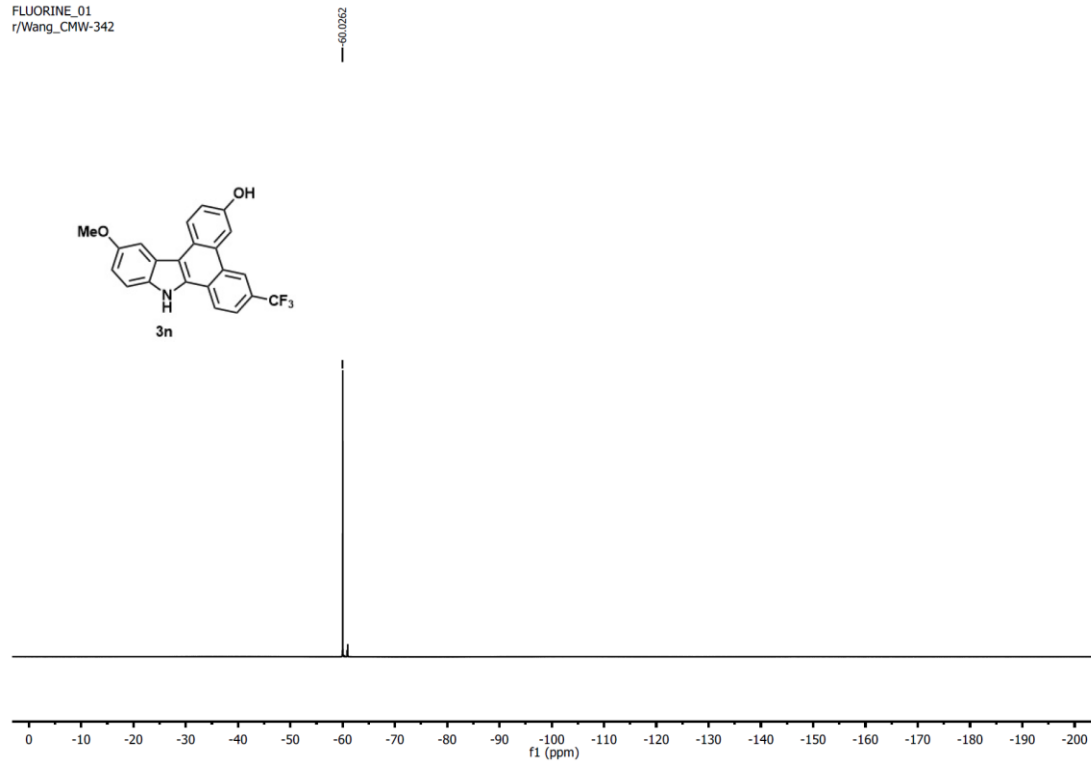

CARBON\_01  
r/Wang\_CMW-342

154.3010  
154.0888  
134.0470  
132.0339  
128.0419  
127.3335  
126.7175  
125.9172  
125.7831  
125.7084  
125.4632  
125.2771  
123.9794  
123.4693  
123.2458  
123.1501  
121.3677  
121.0494  
118.5203  
114.3895  
113.5568  
112.7393  
108.8693  
103.8693

55.9130

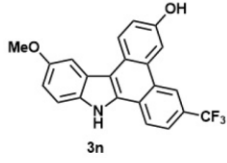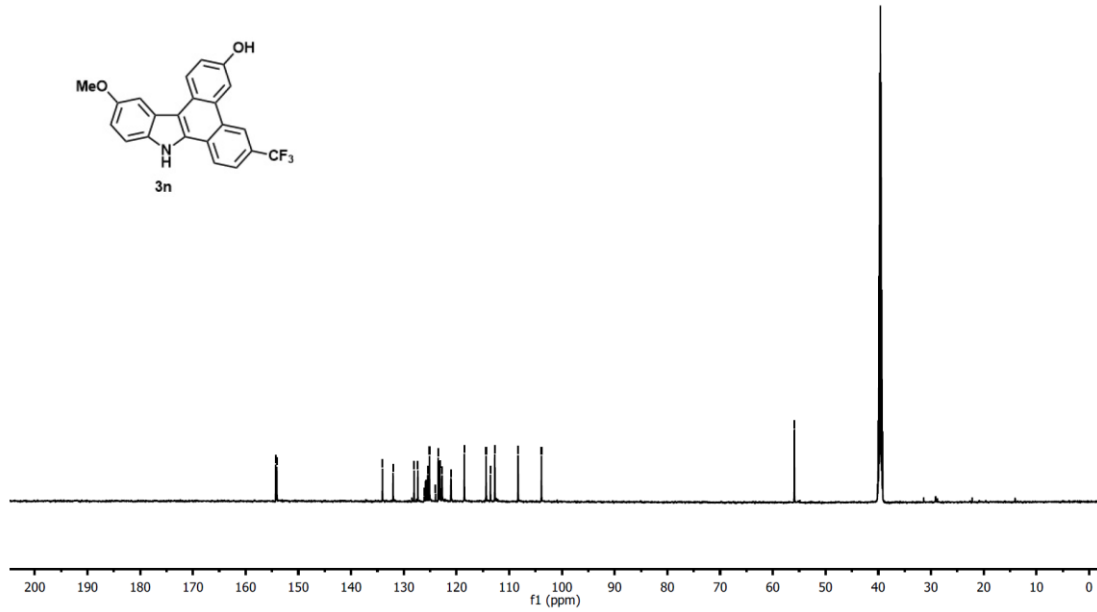

PROTON\_01  
r/Wang\_CMW-356

12.0971

9.6423  
9.2600  
8.7596  
8.6555  
8.5163  
8.5025  
8.4642  
8.1425  
7.7786  
7.7786  
7.7160  
7.7071  
7.7044  
7.6926  
7.6926  
7.6762  
7.6628  
7.6510  
7.5773  
7.5773  
7.3450  
7.3412  
7.2306  
7.2268

1.3028

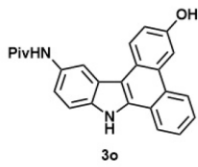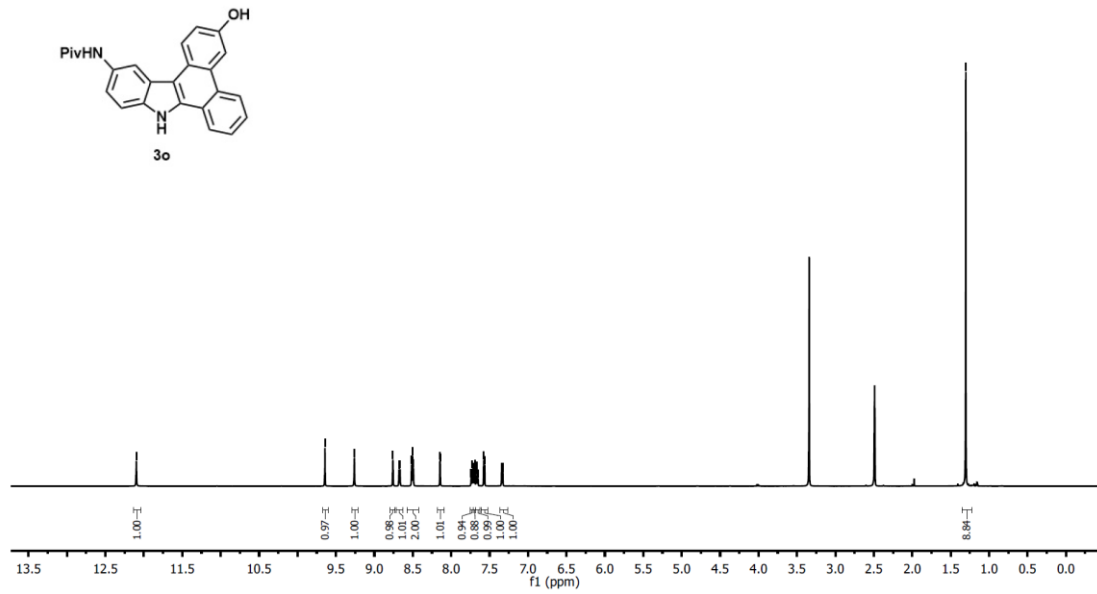

CARBON\_01  
r/Wang\_CMW-356

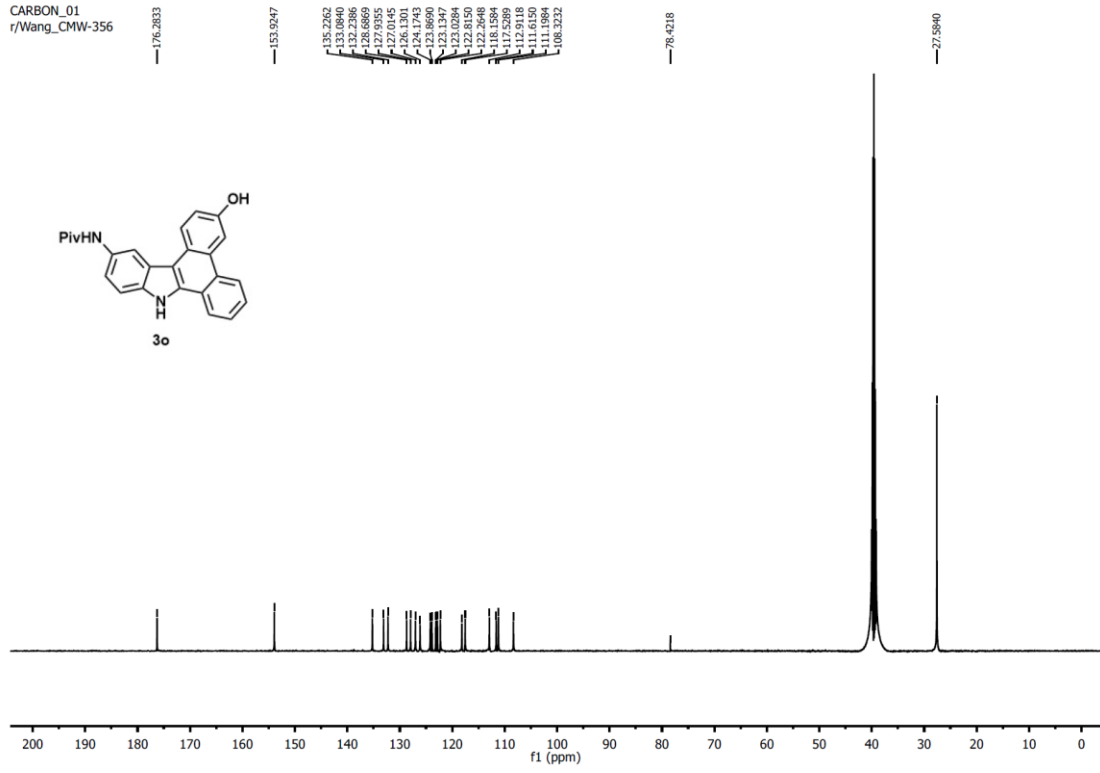

PROTON\_01  
r/Wang\_CMW-379

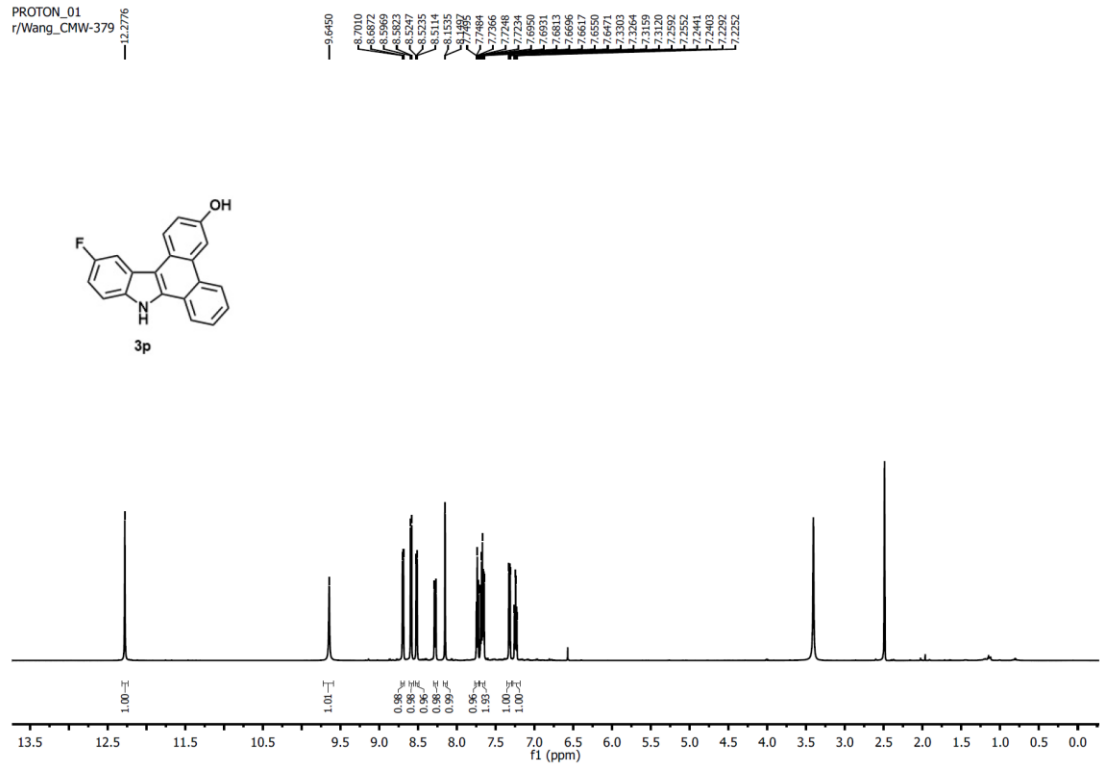

FLUORINE\_01  
r/Wang\_CMW-379

123.6216  
123.6300  
123.6390  
123.6466  
123.6542  
123.6639

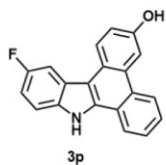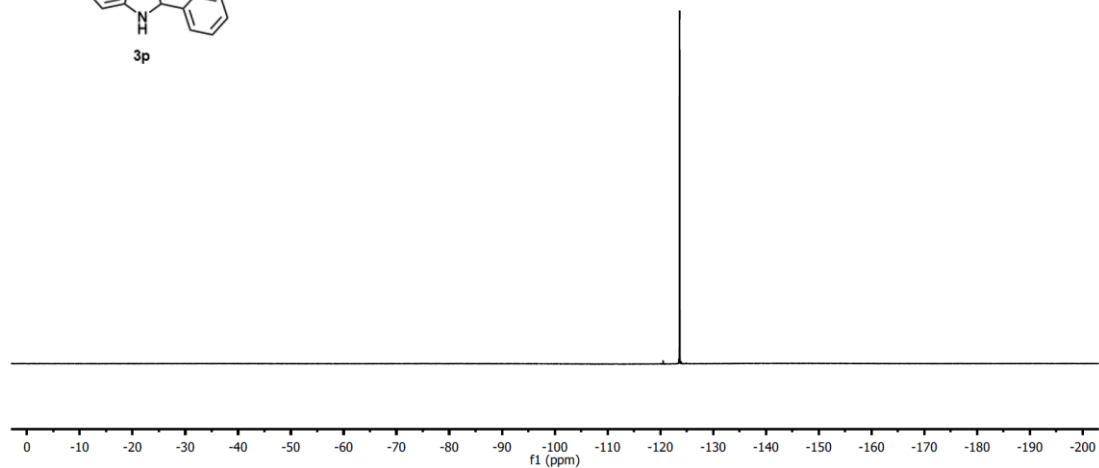

CARBON\_01  
r/Wang\_CMW-379

158.0329  
156.4950  
154.1330  
135.1346  
134.0706  
132.7965  
127.9490  
127.0495  
126.4903  
124.7601  
123.7222  
123.4248  
123.3590  
122.9756  
122.3818  
117.9979  
115.7940  
112.5661  
112.5019  
111.7979  
111.6288  
111.2878  
108.2661  
106.5329  
106.3717

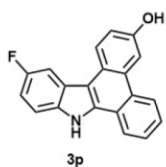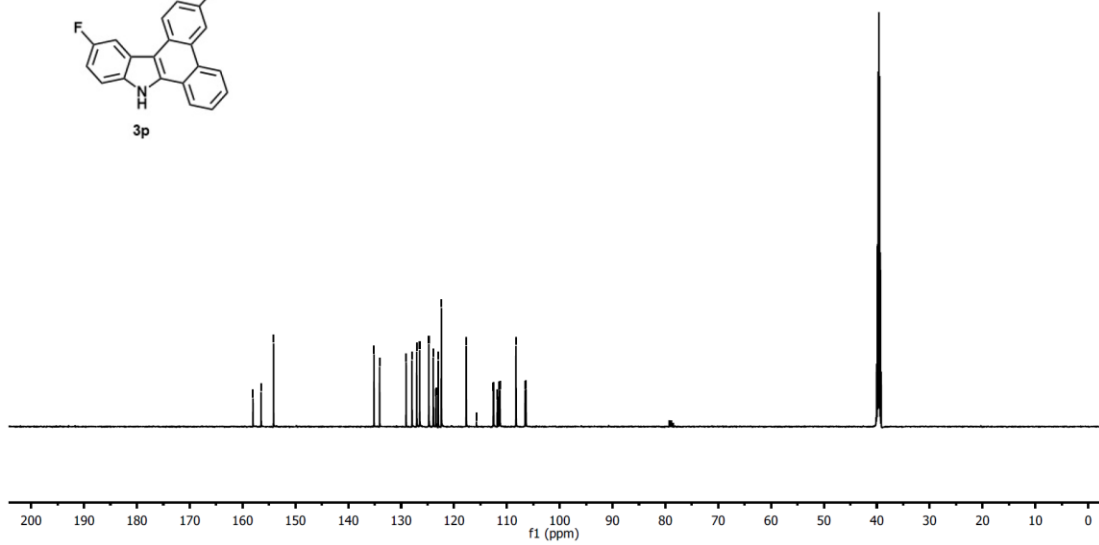



PROTON\_01  
r/Wang\_CMW-379

12.3890

9.6594  
8.7031  
8.6893  
8.6102  
8.5956  
8.5179  
8.5070  
8.1446  
7.7611  
7.7565  
7.7051  
7.6933  
7.6825  
7.6653  
7.4030  
7.3988  
7.3888  
7.3866  
7.3396  
7.3266  
7.3162  
7.3122

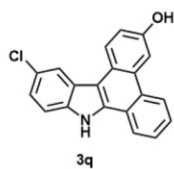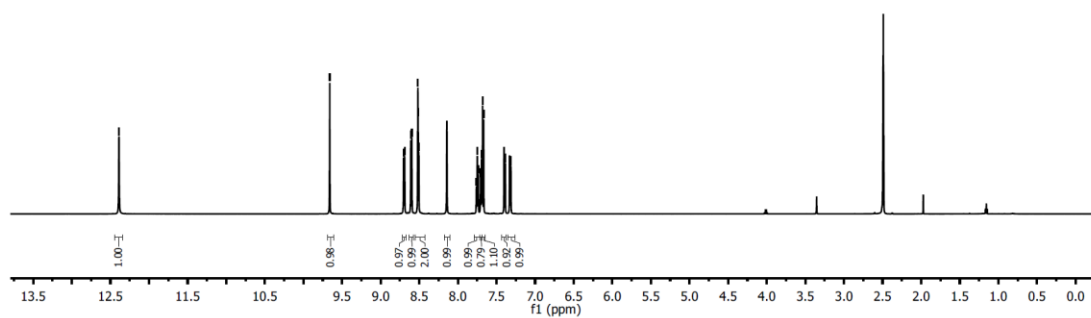

CARBON\_01  
r/Wang\_CMW-379

154.2615

136.9779  
133.6939  
129.1041  
128.9324  
127.1324  
126.6379  
124.9195  
124.4127  
123.8586  
123.3709  
122.8026  
122.4244  
122.2724  
121.8723  
117.7851  
113.1566  
111.2262  
108.2699

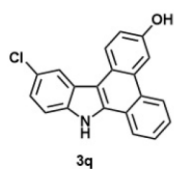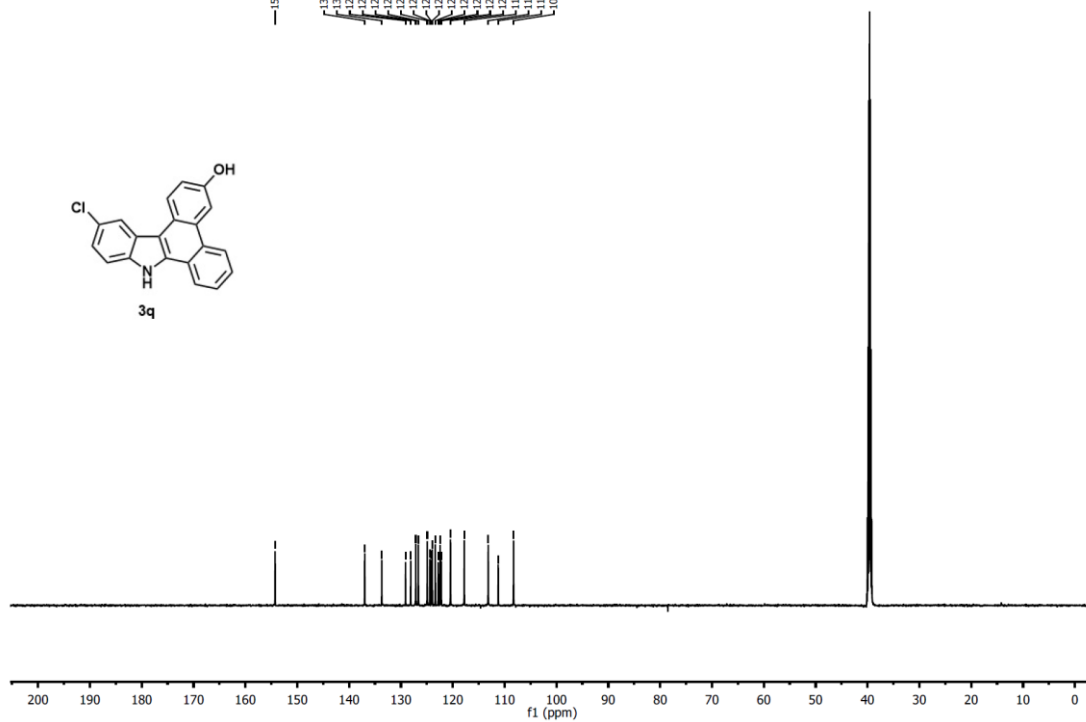

PROTON\_01  
r/Wang\_CMW-380

9.6598  
8.6870  
8.6844  
8.6524  
8.5970  
8.5824  
8.5160  
8.4664  
8.1366  
7.7598  
7.7350  
7.7051  
7.6928  
7.6794  
7.6217  
7.5118  
7.5090  
7.4976  
7.4845  
7.3258  
7.3151  
7.3113

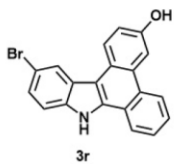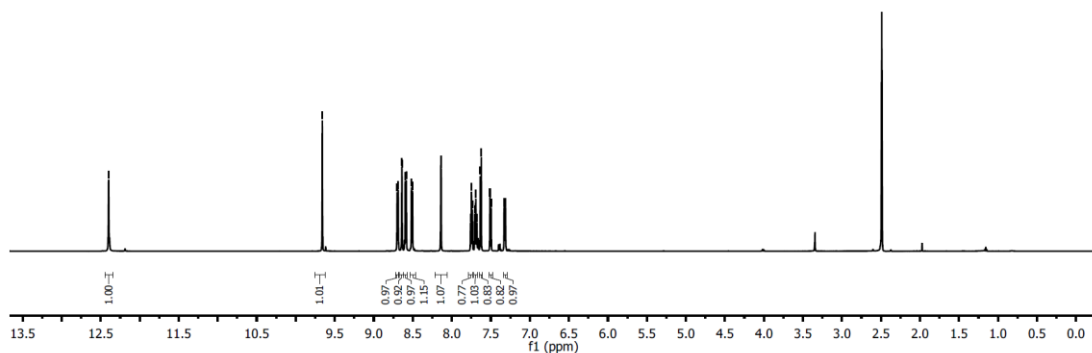

CARBON\_01  
r/Wang\_CMW-380

154.2731  
137.2686  
136.7736  
129.1064  
128.1133  
127.1354  
126.6513  
125.1081  
124.9239  
123.9548  
123.3180  
122.9236  
122.4346  
117.8006  
115.6387  
114.9960  
111.0960  
108.2688

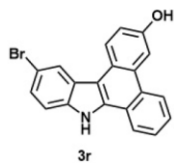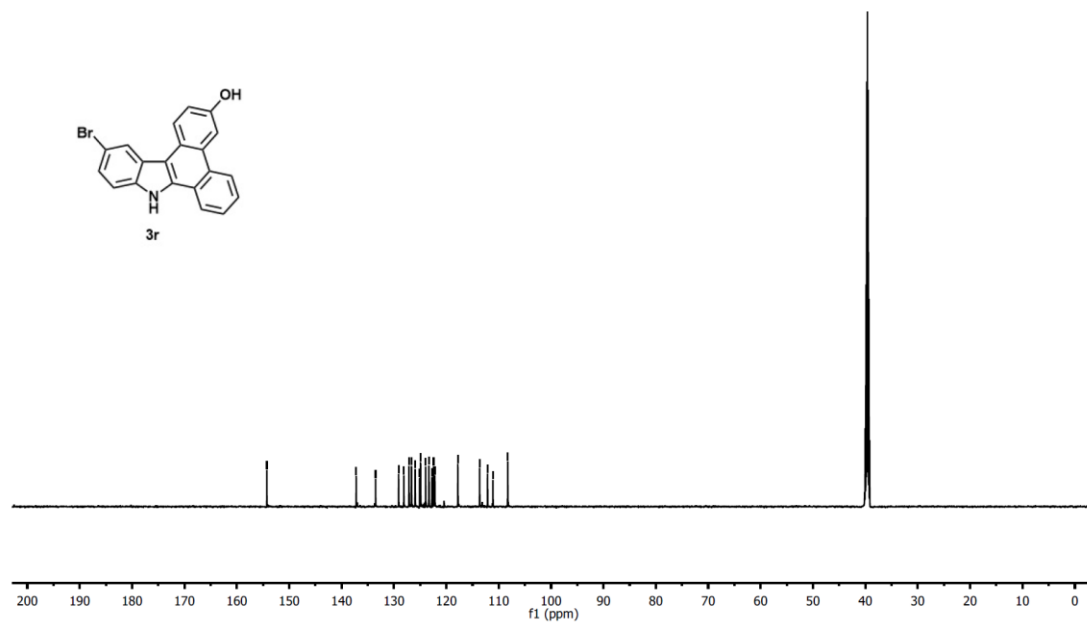

Supplement: d1ra01779a1.pdf [file d1ra01779a1.pdf]
